# Supplementary material for: Evidence of high genetic differentiation driven by limited gene flow in a lower canopy African tropical rainforest tree species, Coula edulis Baill. (Coulaceae)
Source: Research Square preprint supplement (doi:10.21203/rs.3.rs-7285744/v1), 2025-09-06
Supplement: Supplementary file 1 [file f745d0aa952c1ad6025bef26.xlsx]

## Sheet: Morphometric_traits
ID barcode	Collector sampled specimen	Contry	Leaf apex	Petiole hairiness	Shape_ blade	Shape_ base_ leaf blade	Number_Pairs _Secondary _Veins	Leaf_ length	Leaf _width	Acumen_ length	Petiole length	inflorescence_position	Inflorescence_type	Pedicel	Pedicel_ length	Inflorescence _length	Fruit_ length	Fruit_width	Fruit stipe length
BR0000017034678	Jongkind, C.C.H.	LBR	acuminate	pubescent	elliptic	obtuse	11	17.7	8.7	2.8	2	Nr	Nr	Nr	Nr	Nr	Nr	Nr	Nr
BR0000017034685	de Koning J.	LBR	acuminate	pubescent	elliptic	obtuse	8.6	10.8	4.3	1	1.1	axillaire	grappe	pubescent	3	2.76	Nr	Nr	Nr
BR0000017034692	Voorhoeve A.G.	LBR	acuminate	pubescent	elliptic	obtuse	8	14	5.5	2	1.6	axillaire	grappe	pubescent	3	2.76	Nr	Nr	Nr
BR0000017034708	Jongkind, C.C.H	LBR	acuminate	pubescent	elliptic	obtuse	8	10.6	4.9	1.1	1.5	axillaire	grappe	pubescent	3	2.76	Nr	Nr	Nr
BR0000017034715	de Wilde J.J.F.E. & Voorhoeve A.G	LBR	acuminate	pubescent	elliptic	obtuse	9	10.3	4.9	1.4	1.5	axillaire	grappe	pubescent	3	2.76	Nr	Nr	Nr
BR0000017034722	de Wilde (d' Estmael) J	LBR	acuminate	pubescent	elliptic	obtuse	8	17.2	4	1.3	1.8	axillaire	grappe	pubescent	3	2.76	Nr	Nr	Nr
BR0000017035200	Jansen J.W.A.	LBR	acuminate	pubescent	elliptic	obtuse	9	10	2.5	1.3	1.4	axillaire	grappe	pubescent	3	2.76	Nr	Nr	Nr
BR0000017035217	Jansen J.W.A.	LBR	acuminate	pubescent	elliptic	obtuse	8	6	2.3	1.2	1.3	axillaire	grappe	pubescent	2.75	2.76	Nr	Nr	Nr
BR0000017035224	Boss J.J.	LBR	acuminate	pubescent	elliptic	obtuse	8.5	6.5	2.6	0.9	1.1	axillaire	grappe	pubescent	2.5	2.76	Nr	Nr	Nr
BR0000017034937	de Koning J.	CIV	acuminate	pubescent	elliptic	obtuse	11.5	10.5	5	1.2	1.5	axillaire	grappe	pubescent	2.5	2.76	Nr	Nr	Nr
BR0000017034791	Leeuwenberg A.J.M	CIV	acuminate	pubescent	elliptic	obtuse	8.5	19.5	7	1.7	1.6	Nr	Nr	Nr	Nr	Nr	Nr	Nr	Nr
BR0000017034807	Versteegh C. & Den Outer R.W.	CIV	acuminate	pubescent	elliptic	obtuse	10	17	6.2	1.8	1.4	axillaire	grappe	pubescent	2	2.65	Nr	Nr	Nr
BR0000017034821	Bamps P.	CIV	acuminate	pubescent	elliptic	obtuse	8.5	17.5	3.2	1.6	2.3	Nr	Nr	Nr	Nr	Nr	Nr	Nr	Nr
BR0000017034845	Bamps P.	CIV	acuminate	pubescent	elliptic	obtuse	7.5	8.5	5	1.6	2.3	Nr	Nr	Nr	Nr	Nr	Nr	Nr	Nr
BR0000006274528	Oldeman R.	CIV	acuminate	pubescent	elliptic	obtuse	11	15.5	5	1.7	1.6	Nr	Nr	Nr	Nr	Nr	Nr	Nr	Nr
BR0000017034890	Van der Burg W.J.	CIV	acuminate	pubescent	elliptic	obtuse	10.5	7	4.2	0.88	1.25	axillaire	grappe	pubescent	1	2.1	Nr	Nr	Nr
BR0000017034807	Versteegh C. & Den Outer R.W.	CIV	acuminate	pubescent	elliptic	obtuse	10.5	9	3.7	1	0.7	axillaire	grappe	pubescent	1.5	2.8	Nr	Nr	Nr
BR0000017034869	de Koning J.	CIV	acuminate	pubescent	elliptic	obtuse	9.5	8.3	3.3	1.1	1.1	axillaire	grappe	pubescent	1	1.5	Nr	Nr	Nr
BR0000017034777	de Koning J.	CIV	acuminate	pubescent	elliptic	obtuse	8.5	8	3	0.8	1.05	Nr	Nr	Nr	Nr	Nr	2.3	1.5	2
BR0000006271220	Enti A. A.	GHA	acuminate	pubescent	elliptic	obtuse	9.5	12.55	6.8	1.75	2.05	Nr	Nr	Nr	Nr	Nr	3.25	2	1
BR0000017034883	Andoh J.E	GHA	acuminate	pubescent	elliptic	obtuse	9.7	9.3	3.15	0.65	0.9	Nr	Nr	Nr	Nr	Nr	Nr	Nr	Nr
BR0000009093140	de Carvalho M.F.	GNQ	acuminate	pubescent	elliptic	obtuse	9.8	13.3	6.8	1.5	1.75	Nr	Nr	Nr	Nr	Nr	2.4	2.3	1.2
BR0000006274498	Carvalho	GNQ	acuminate	pubescent	elliptic	obtuse	9.1	8.5	3.3	1.3	1.19	axillaire	grappe	pubescent	0.5	1.6	Nr	Nr	Nr
BR0000017035019	Kennedy	NGR	acuminate	pubescent	elliptic	obtuse	11.5	16.5	6.5	2.3	2	axillaire	grappe	pubescent	1	1.4	Nr	Nr	Nr
BR0000017035125	Ndoutoume M.	GAB	acuminate	pubescent	elliptic	obtuse	9	12.5	5.75	1.17	1.55	Nr	Nr	Nr	Nr	Nr	Nr	Nr	Nr
BR0000017035293	Schoenmaker J.	GAB	acuminate	pubescent	elliptic	obtuse	8	11.5	4.75	1.85	1.7	Nr	Nr	Nr	Nr	Nr	2	0.5	1.9
BR0000017035392	de Wilde J.J.F.E., Arends J., Louis A.M., Bouman F. & Karper J	GAB	acuminate	pubescent	elliptic	obtuse	7	6.4	3.4	0.85	1.1	axillaire	grappe	pubescent	1	1.9	Nr	Nr	Nr
BR0000017035279	Louis A.M	GAB	acuminate	pubescent	elliptic	obtuse	10.3	8	2.6	0.8	0.75	axillaire	grappe	pubescent	2	0.75	1.3	1	1.5
BR0000017035316	Breteler	GAB	acuminate	pubescent	elliptic	obtuse	10.5	8	2.75	1.1	1.1	Nr	Nr	Nr	Nr	Nr	2	1.25	1.75
BR0000017035385	de Wilde J.J.F.E., Arends J., Louis A.M., Bouman F. & Karper J	GAB	acuminate	pubescent	elliptic	obtuse	11.5	8	3.75	0.7	1	axillaire	grappe	pubescent	1	0.75	Nr	Nr	Nr
BR0000017035408	de Wilde J.J.F.E.	GAB	acuminate	pubescent	elliptic	obtuse	9	6.7	2.5	0.75	1.3	Nr	Nr	Nr	Nr	Nr	2.5	1	1
BR0000017035422	Arends J.C., Louis A.M. & de Wilde J.J.F.E.	GAB	acuminate	pubescent	elliptic	obtuse	11	8.3	3.3	2.3	1.4	axillaire	grappe	pubescent	1.5	0.75	Nr	Nr	Nr
BR0000013170349	Dessein S.	GAB	acuminate	pubescent	elliptic	obtuse	10.5	10	2.8	1.1	1.2	Nr	Nr	Nr	Nr	Nr	Nr	Nr	Nr
BR0000013299750	de Briey J.	COD	acuminate	pubescent	elliptic	obtuse	8.5	9	2.7	1.2	1.2	Nr	Nr	Nr	Nr	Nr	Nr	Nr	Nr
BR0000006271190	Hombert J.	COD	acuminate	pubescent	elliptic	obtuse	8.5	10	5.5	1.5	1.5	Nr	Nr	Nr	Nr	Nr	1	2.5	1.5
BR0000006274207	Germain R.G.A	COD	acuminate	pubescent	elliptic	obtuse	8	15.5	6.2	1.6	1.4	Nr	Nr	Nr	Nr	Nr	Nr	Nr	Nr
BR0000017035231	Leeuwenberg A.J.M	CMR	acuminate	pubescent	elliptic	obtuse	11	9	3.2	1.4	1.3	axillaire	grappe	pubescent	1	0.75	Nr	Nr	Nr
BR0000006780548	Cheek M.R.	CMR	acuminate	pubescent	elliptic	obtuse	12	12.5	4.5	1.2	1.3	Nr	Nr	Nr	Nr	Nr	Nr	Nr	Nr
BR0000017034944	Martin Etuge & Ducan	CMR	acuminate	pubescent	elliptic	obtuse	11.5	10	3.5	1.4	0.8	axillaire	grappe	pubescent	1	0.75	0.9	0.6	0.5
BR0000017035194	Leeuwenberg A.J.M	CMR	acuminate	pubescent	elliptic	obtuse	12.5	9.5	3.2	1.3	1.1	Nr	Nr	Nr	Nr	Nr	Nr	Nr	Nr
BR0000017035170	Leeuwenberg A.J.M	CMR	acuminate	pubescent	elliptic	obtuse	11	10	5	1.2	1.1	axillaire	grappe	pubescent	1	2.5	Nr	Nr	Nr
BR0000005510146	Lachenaud O., Lemaire B., Simo M. & Sonké B.	CMR	acuminate	pubescent	elliptic	obtuse	14	10	4	1.3	1.2	Nr	Nr	Nr	Nr	Nr	Nr	Nr	Nr
BR0000005336807	Lachenaud O., Lemaire B., Simo M. & Sonké B.	CMR	acuminate	pubescent	elliptic	obtuse	13	8.7	2.8	1.6	1.3	Nr	Nr	Nr	Nr	Nr	Nr	Nr	Nr

## Sheet: nSSR
ID	Contry	Longitude	Latitude	Ced02-01	Ced02-02	Ced09-01	Ced09-02	Ced04-01	Ced04-02	Ced03-01	Ced03-02	Ced10-01	Ced10-02	Ced05-01	Ced05-02	Ced15-01	Ced15-02	Ced18-01	Ced18-02	Ced22-01	Ced22-02	Ced16-01	Ced16-02	Ced14-01	Ced14-02	Ced23-01	Ced23-02	Ced17-01	Ced17-02	Ced20-01	Ced20-02	Ced27-01	Ced27-02	Ced32-01	Ced32-02	Ced26-01	Ced26-02	Ced31-01	Ced31-02	Ced25-01	Ced25-02	Ced13-01	Ced13-02	Ced28-01	Ced28-02
BoD0870	Liberia	-8.8161	5.33056	133	133	212	214	137	137	118	128	208	210	142	142	129	131	197	197	248	248	130	130	122	124	290	292	140	140	190	190	117	121	189	201	118	118	207	207	0	0	118	118	0	0
BoD0945	Liberia	-8.62538	5.51404	125	133	212	218	137	137	118	120	208	210	142	142	129	129	181	181	248	248	126	130	120	120	0	0	140	140	190	190	121	121	189	201	118	120	207	207	0	0	118	118	157	157
BoD1056	Liberia	-8.32794	5.61463	133	133	212	214	137	142	118	122	208	210	142	142	129	129	0	0	248	248	126	126	120	122	284	284	140	140	190	190	117	121	201	201	116	118	207	207	0	0	118	118	157	157
BoD1067	Liberia	-8.35679	5.64173	131	133	212	212	137	137	118	120	208	208	142	142	129	129	0	0	248	248	126	134	122	122	294	310	140	140	190	190	121	121	201	201	116	120	197	207	0	0	118	118	0	0
BoD1096	Liberia	-8.35732	5.64244	133	133	212	212	137	137	118	122	208	208	142	142	129	129	181	181	248	248	126	130	122	122	0	0	140	140	190	190	121	121	189	201	116	120	197	207	0	0	118	118	0	0
BoD1104	Liberia	-8.35702	5.64279	133	133	212	214	137	137	118	118	208	208	142	142	129	129	0	0	248	248	120	134	122	122	284	296	140	140	190	190	121	121	189	201	116	116	201	201	0	0	118	118	157	157
BoD1204	Liberia	-8.90749	5.13241	127	129	212	214	137	137	120	138	210	210	142	142	129	129	183	183	248	248	130	130	122	122	290	296	140	140	188	190	113	117	201	201	116	116	197	207	144	144	118	118	157	157
BoD1287	Liberia	-8.90434	5.13122	127	127	212	212	137	137	120	138	210	210	142	142	129	129	0	0	248	248	130	130	122	122	273	284	140	140	188	190	121	121	189	201	116	116	207	207	189	200	118	118	157	157
BoD1288	Liberia	-8.90435	5.13115	127	127	212	212	137	137	122	138	210	210	142	142	129	129	0	0	248	248	130	130	122	122	273	284	140	140	188	190	113	121	189	201	116	118	205	207	0	0	118	118	157	157
BoD1341	Liberia	-8.58453	5.68216	109	129	212	214	137	137	116	118	210	210	142	142	129	129	0	0	248	248	126	134	122	122	290	294	140	140	190	190	117	117	189	189	116	118	207	207	189	189	118	118	0	0
BoD1379	Liberia	-8.58408	5.68162	121	127	212	214	137	137	116	118	208	210	142	142	129	129	181	181	248	248	126	130	122	122	290	290	140	140	190	190	121	121	201	201	116	118	201	207	0	0	118	118	157	157
BoD1382	Liberia	-8.58394	5.68155	129	133	212	214	137	137	118	118	208	210	142	142	129	129	0	0	248	248	126	134	122	122	294	296	140	140	190	190	117	117	189	189	116	116	201	201	0	0	118	118	157	157
BoD1559	Liberia	-8.63963	7.48955	125	127	212	212	137	137	118	134	210	210	142	142	129	129	0	0	248	248	130	134	120	122	290	290	140	140	190	190	121	121	189	201	116	116	201	223	0	0	118	118	157	157
BoD1575	Liberia	-8.63995	7.48933	125	133	212	214	137	147	118	120	210	210	142	142	129	129	0	0	248	248	130	132	122	122	0	0	140	140	190	190	121	121	201	205	116	118	201	223	0	0	118	118	157	157
BoD1670	Liberia	-8.64865	7.47834	125	125	212	212	142	147	118	118	210	210	142	142	129	129	0	0	248	248	130	134	120	122	0	0	140	140	190	190	121	121	201	203	116	116	207	207	0	0	118	118	0	0
BoD1946	Liberia	-8.63781	7.55706	119	127	212	214	137	137	118	118	210	210	142	142	129	129	0	0	248	248	130	130	120	120	290	294	140	140	190	190	121	121	201	205	116	118	201	207	0	0	118	118	0	0
BR01	Liberia	-10.5433	6.69111	117	131	0	0	137	137	120	122	0	0	142	142	0	0	0	0	0	0	0	0	0	0	0	0	0	0	0	0	121	121	0	0	116	116	0	0	127	135	118	118	0	0
BR02	Liberia	-8.20389	5.66861	129	131	0	0	137	137	120	120	0	0	142	142	0	0	0	0	0	0	0	0	122	122	0	0	0	0	0	0	121	121	0	0	118	118	0	0	0	0	118	118	0	0
BR05	Liberia	-8.8145	5.35383	121	133	212	214	137	137	118	120	210	210	142	142	129	129	0	0	0	0	0	0	122	122	0	0	140	140	0	0	121	121	0	0	116	116	197	197	0	0	118	118	157	157
BR07	Liberia	0.74	6.021	125	133	212	212	137	137	120	122	208	208	142	142	129	129	0	0	0	0	0	0	122	122	0	0	140	142	0	0	119	121	0	0	116	116	0	0	0	0	118	118	0	0
BR08	Ivory Coast	-6.95	4.68333	125	125	212	212	137	137	118	120	212	212	142	144	129	129	0	0	0	0	120	132	120	122	0	0	140	140	0	0	119	121	0	0	116	116	207	209	0	0	118	118	0	0
BR12	Ivory Coast	-3.9	5.81667	125	125	212	212	137	137	118	120	0	0	142	150	0	0	0	0	0	0	0	0	120	120	0	0	140	142	0	0	121	125	0	0	118	118	0	0	0	0	117	117	0	0
BR14	Ivory Coast	-3.98333	5.7	125	125	0	0	137	137	118	118	208	208	142	142	129	129	0	0	0	0	120	130	120	120	0	0	142	142	0	0	121	121	0	0	118	118	0	0	0	0	118	118	0	0
BR15	Ivory Coast	-4.05	5.55	119	125	218	218	0	0	118	118	198	198	142	142	0	0	0	0	0	0	120	130	120	120	0	0	0	0	0	0	121	129	189	189	116	118	0	0	0	0	118	118	0	0
BR16	Ivory Coast	-4.13333	5.38333	125	125	216	216	137	137	120	120	0	0	142	142	129	129	0	0	0	0	130	130	120	120	0	0	0	0	0	0	121	121	0	0	118	118	0	0	0	0	118	118	0	0
BR17	Ivory Coast	-7.33333	6.61667	125	131	212	212	137	137	118	118	210	210	142	142	129	129	0	0	0	0	120	120	122	122	0	0	140	140	0	0	117	117	189	189	116	118	0	0	0	0	118	118	157	157
BR18	Ivory Coast	-4.05	5.38333	123	125	212	212	137	137	120	120	0	0	142	142	0	0	0	0	0	0	0	0	0	0	0	0	0	0	0	0	119	125	0	0	120	120	0	0	0	0	118	118	157	157
BR19	Ivory Coast	-7.23333	6.56667	125	131	212	212	137	137	118	118	208	208	142	142	129	129	179	179	0	0	120	130	122	122	0	0	140	140	0	0	0	0	0	0	0	0	0	0	0	0	0	0	0	0
BR20	Ivory Coast	-4.05194	5.39444	125	125	212	218	137	137	118	120	208	208	142	142	129	129	0	0	0	0	120	120	120	120	0	0	0	0	0	0	121	129	0	0	118	118	0	0	0	0	118	118	0	0
GK0499	Ivory Coast	-7.04957	5.04951	127	127	212	212	137	137	118	118	210	212	142	142	129	129	0	0	0	0	120	132	122	122	0	0	134	140	0	0	121	121	189	189	116	116	207	207	0	0	118	118	157	157
GK0505	Ivory Coast	-7.04941	5.04937	125	127	212	212	137	137	118	122	210	210	142	142	129	129	0	0	248	248	132	134	122	122	0	0	140	140	190	194	121	121	189	189	116	116	207	207	0	0	118	118	157	157
GK0509	Ivory Coast	-7.04936	5.04932	125	125	212	212	137	137	118	118	210	212	142	142	129	129	0	0	248	248	114	132	122	122	0	0	140	140	190	194	121	121	189	201	116	116	207	207	0	0	118	118	157	157
GK0577	Ivory Coast	-7.05308	5.05089	125	125	212	212	137	137	118	118	208	210	142	142	129	129	0	0	248	248	120	132	120	120	0	0	140	140	190	190	121	121	189	201	116	116	207	207	0	0	118	118	157	157
GK0606	Ivory Coast	-7.05861	5.04655	117	129	212	212	137	137	118	118	212	212	142	142	129	129	0	0	0	0	132	132	120	120	0	0	140	140	0	0	121	121	189	189	116	116	207	207	0	0	118	118	157	157
GK0616	Ivory Coast	-7.05889	5.04641	117	125	212	212	137	137	118	118	210	212	142	142	129	129	181	181	248	248	132	132	120	120	0	0	140	140	194	196	121	121	201	201	116	118	207	207	0	0	118	118	157	157
GK0630	Ivory Coast	-7.05913	5.04644	117	125	212	212	137	137	116	118	208	212	142	142	129	129	187	187	248	248	120	130	120	122	0	0	140	140	190	190	117	121	201	201	116	116	207	207	0	0	118	118	157	157
GK1049	Ivory Coast	-7.37116	6.40745	125	125	212	212	137	145	118	118	208	208	142	142	129	129	0	0	248	248	130	130	122	122	0	0	140	140	190	190	121	121	201	201	116	118	207	209	0	0	118	118	157	157
GK1068	Ivory Coast	-7.36992	6.40755	113	129	212	212	137	137	118	118	210	210	142	142	129	129	181	181	248	248	120	130	122	122	0	0	140	140	190	190	121	121	201	201	116	116	207	207	0	0	118	118	157	157
GK1080	Ivory Coast	-7.37022	6.40862	113	113	212	212	137	137	118	118	208	210	142	142	129	129	0	0	248	258	130	130	122	122	299	299	140	140	190	190	117	121	201	201	116	118	201	207	0	0	118	118	157	157
BR37	Ghana	-2.56028	5.63121	127	127	212	212	137	137	118	118	208	208	142	142	129	129	0	0	0	0	120	130	0	0	0	0	140	142	0	0	121	127	0	0	118	118	203	203	137	137	118	118	0	0
BR38	Ghana	-2.5619	5.61656	117	121	212	212	137	137	118	120	208	208	142	142	129	129	0	0	0	0	120	130	0	0	0	0	0	0	0	0	121	127	0	0	0	0	0	0	0	0	0	0	157	157
FOLI213	Ghana	-2.84022	5.91741	125	127	218	218	137	137	118	120	208	210	142	142	129	129	181	181	248	248	120	130	120	120	0	0	140	140	190	190	121	121	201	201	118	118	207	207	0	0	118	118	157	157
WHA0350	Ghana	-2.64827	5.21689	119	129	212	212	137	137	118	120	208	208	142	142	127	129	181	181	248	248	124	130	120	120	0	0	140	140	190	190	121	121	0	0	118	126	0	0	0	0	118	118	0	0
BR36	Nigeria	5.61444	6.3175	109	109	0	0	0	0	126	130	212	212	154	156	139	139	169	175	0	0	132	132	0	0	0	0	0	0	0	0	0	0	0	0	132	140	0	0	0	0	136	136	163	163
BR27	Cameroon	9.19528	4.02194	109	109	232	232	155	155	126	130	200	200	154	154	0	0	0	0	0	0	132	132	0	0	0	0	142	142	0	0	135	135	0	0	128	130	0	0	137	137	0	0	0	0
BR28	Cameroon	9.41667	4.45	109	129	230	232	155	155	126	126	200	200	154	154	0	0	0	0	0	0	134	134	0	0	0	0	142	142	202	202	135	135	0	0	140	140	0	0	137	137	0	0	0	0
BR30	Cameroon	9.41667	4.63333	109	109	220	222	145	145	134	138	200	200	152	154	133	133	169	169	0	0	132	132	126	136	0	0	142	142	0	0	135	135	223	223	140	140	199	201	136	136	132	136	177	177
BR31	Cameroon	10.4167	3.5	117	117	212	212	0	0	132	138	216	216	150	152	0	0	0	0	0	0	132	132	0	0	0	0	0	0	0	0	125	137	0	0	128	128	0	0	136	136	0	0	0	0
BS0001	Cameroon	10.5334	2.7716	117	117	216	220	142	145	124	132	212	214	154	156	129	131	169	173	256	256	116	124	122	122	258	272	142	142	198	198	133	135	217	221	108	128	199	199	137	141	124	124	175	177
BS0002	Cameroon	10.792	2.6909	123	123	216	216	145	163	134	138	200	212	158	158	139	139	173	173	260	264	116	116	128	142	246	272	140	140	196	202	127	137	215	221	128	128	201	201	121	121	120	132	163	169
BS0004	Cameroon	10.9757	3.3965	109	117	208	208	145	149	112	112	200	220	156	166	137	139	165	169	256	256	124	130	138	138	258	260	142	142	200	200	131	137	221	221	128	130	199	207	121	135	132	132	165	165
BS0005	Cameroon	10.5328	2.7725	117	123	206	216	145	149	124	130	214	218	154	158	137	139	169	173	258	258	116	130	128	138	0	0	142	142	198	202	131	131	209	209	108	128	199	199	135	141	120	132	161	177
BS0006	Cameroon	10.4297	3.104	117	123	218	242	149	163	134	134	212	212	158	160	129	139	169	173	248	250	124	126	126	136	258	262	142	142	198	202	133	139	221	221	108	128	199	199	137	141	124	132	165	175
BS0007	Cameroon	10.9669	3.4093	117	121	214	246	151	157	112	112	200	220	152	152	127	137	169	169	256	256	124	124	124	124	260	260	142	142	194	200	135	135	221	221	128	128	199	199	137	137	132	132	165	169
BS0008	Cameroon	10.968	3.4059	117	117	216	246	165	165	112	112	200	220	152	156	127	127	169	173	256	256	124	124	138	138	0	0	142	142	194	200	135	135	221	221	108	128	199	207	137	137	124	132	165	177
BS0009	Cameroon	10.534	2.7641	117	125	218	218	145	149	124	134	212	212	154	158	137	137	173	173	256	256	124	130	122	126	258	262	142	142	198	204	131	139	0	0	108	108	199	199	141	141	119	132	175	177
BS0010	Cameroon	10.7882	2.7016	117	123	210	220	145	149	112	122	200	200	152	156	129	139	169	173	250	256	124	130	122	128	246	246	142	142	196	198	137	137	217	221	108	116	199	199	123	123	128	132	177	177
BS0011	Cameroon	10.7901	2.6844	117	117	216	218	145	161	124	124	210	212	154	154	137	139	169	173	250	260	130	130	122	140	272	272	142	142	186	200	127	137	209	215	130	130	199	199	121	121	120	120	161	177
BS0013	Cameroon	10.4772	3.1644	117	117	0	0	143	145	134	136	0	0	152	152	127	127	0	0	0	0	124	132	124	138	0	0	0	0	0	0	131	135	0	0	128	128	0	0	137	141	132	132	0	0
BS0015	Cameroon	10.5342	2.749	121	121	212	216	145	155	122	124	212	218	158	160	127	137	169	169	0	0	116	124	122	122	0	0	142	142	198	198	133	135	223	223	140	140	0	0	137	137	124	132	175	175
FM2033	Cameroon	9.88757	2.56927	117	117	212	214	145	145	138	142	200	212	152	160	127	137	169	169	248	256	124	130	122	134	0	0	142	142	198	204	127	141	213	213	108	128	199	199	121	137	120	120	165	173
FM2036	Cameroon	9.88755	2.56286	121	123	206	214	145	145	112	132	216	216	152	156	129	137	169	173	256	256	124	124	136	142	260	272	142	142	198	200	125	125	215	215	108	128	199	199	137	145	84	120	163	173
FM2048	Cameroon	9.88847	2.55932	117	133	206	224	145	145	122	132	212	212	152	156	137	139	169	173	248	252	116	124	122	138	260	262	142	142	200	204	135	135	211	211	108	128	199	199	137	137	120	120	165	169
FM2145	Cameroon	9.89648	2.53456	121	123	216	224	155	155	132	134	200	210	158	158	127	127	171	175	262	264	124	124	126	140	258	258	136	136	186	202	135	135	211	213	108	130	199	199	121	121	120	120	171	175
FM2152	Cameroon	9.89295	2.52781	121	123	206	212	149	149	112	124	212	214	158	160	133	133	173	179	256	256	124	130	122	138	272	272	142	142	190	200	125	135	221	221	128	128	199	201	137	137	120	120	171	177
FM2153	Cameroon	9.89125	2.52228	117	121	206	208	142	147	120	136	210	212	160	168	131	133	169	169	256	264	124	132	122	126	258	258	142	142	200	212	125	135	213	215	108	128	201	205	137	137	120	132	169	173
FM2271	Cameroon	10.7921	2.44101	117	117	208	224	145	149	132	138	200	214	156	160	133	133	169	173	248	268	122	126	144	144	246	262	142	142	196	198	125	137	0	0	116	136	199	201	121	121	132	136	161	175
FM2276	Cameroon	10.7919	2.44164	121	123	216	216	145	145	112	144	200	210	152	160	137	137	169	169	256	268	124	130	128	144	246	246	142	142	198	208	125	135	209	209	128	140	199	201	123	137	132	132	169	169
FM2279	Cameroon	10.7913	2.44209	117	121	216	236	149	165	132	132	200	212	152	152	127	139	169	169	248	248	124	130	122	124	258	258	142	142	198	220	131	131	209	221	142	142	199	199	137	137	120	132	165	175
FM2424	Cameroon	10.7385	2.39896	109	123	224	224	145	145	112	124	200	212	156	156	127	145	169	169	223	264	124	134	128	128	0	0	142	142	0	0	125	125	209	221	122	128	199	205	137	137	120	132	169	171
FM2476	Cameroon	10.7333	2.37702	109	117	206	236	145	149	124	138	214	220	156	156	133	139	169	169	256	264	118	130	128	132	260	260	142	142	198	198	125	137	221	221	128	142	199	205	121	121	120	132	177	177
FM2487	Cameroon	10.7298	2.37902	117	123	206	216	145	145	132	138	200	214	154	158	133	137	169	169	256	256	124	124	122	128	260	260	144	144	198	200	125	137	203	225	108	136	199	199	121	121	136	136	177	181
JD0048	Cameroon	8.8564	5.065	109	129	230	230	157	157	126	126	200	212	156	156	139	139	169	169	0	0	132	132	134	134	0	0	142	142	200	200	135	135	221	221	128	140	199	199	137	137	136	136	0	0
JD0061	Cameroon	8.8338	5.0605	129	129	206	230	155	155	126	126	212	212	154	154	139	139	169	169	250	250	132	132	134	134	0	0	142	142	206	206	135	135	223	223	128	132	199	199	121	137	132	136	163	165
JD0116	Cameroon	8.8535	5.064	109	129	230	230	157	157	126	130	212	212	154	156	139	139	169	169	250	258	132	132	134	136	0	0	142	142	202	206	135	135	223	223	140	140	199	199	121	137	136	136	165	165
JM0206	Cameroon	10.6294	2.44081	117	125	212	214	145	155	136	138	210	212	160	162	133	133	169	169	256	264	124	130	122	122	258	262	142	142	198	202	129	129	0	0	126	129	199	205	137	137	120	132	165	169
JM0216	Cameroon	10.6322	2.44201	117	121	212	214	145	145	122	132	200	200	152	156	137	139	161	173	256	256	122	130	128	128	260	260	142	142	200	202	125	137	223	225	130	136	199	199	121	121	120	132	165	169
JM0249	Cameroon	10.6272	2.44072	123	123	212	216	145	155	112	132	200	212	152	156	127	145	161	169	256	264	124	130	128	128	262	262	142	142	198	200	125	131	215	215	108	108	199	199	121	121	120	124	169	171
MH1862	Cameroon	10.0491	3.3383	117	117	214	226	145	145	130	134	200	212	152	152	133	137	169	177	256	262	116	128	134	134	0	0	142	142	210	210	131	135	213	223	128	140	199	199	137	137	120	132	175	175
MH1863	Cameroon	10.0187	3.3344	123	123	216	224	145	145	112	132	200	214	152	152	137	139	169	175	248	264	124	138	124	138	0	0	142	142	188	194	125	131	217	221	130	138	199	201	137	137	120	120	169	175
MH1864	Cameroon	10.0536	3.3554	123	125	216	222	145	155	130	130	200	212	152	162	129	133	169	175	256	256	130	138	128	136	258	272	142	142	208	210	131	135	209	223	108	128	199	199	121	137	132	132	165	175
MH1865	Cameroon	10.4595	3.148	117	125	216	218	149	157	130	130	214	214	152	156	127	137	169	169	0	0	124	124	124	128	0	0	142	142	0	0	135	141	221	221	128	128	199	207	121	137	120	124	165	165
MH2372	Cameroon	10.5399	2.74911	117	117	212	216	149	149	124	132	200	220	154	160	137	137	169	173	256	264	124	130	122	142	262	262	142	142	198	198	131	137	211	221	108	108	199	201	141	141	124	132	169	173
MH2524	Cameroon	10.5254	3.1871	109	109	214	218	145	155	134	134	212	212	152	154	127	133	169	169	256	268	116	124	122	122	262	262	142	142	194	200	129	131	221	221	128	130	201	209	121	141	132	132	175	183
MH2524b	Cameroon	10.5254	3.1878	109	109	214	218	145	155	134	134	212	212	152	154	127	133	169	169	256	268	116	124	122	122	0	0	142	142	194	200	129	131	221	221	128	130	201	209	121	141	132	132	175	183
MH2683	Cameroon	10.7386	3.34348	109	127	208	216	155	165	138	144	200	212	144	152	135	139	169	175	256	268	122	124	128	138	0	0	142	142	200	200	135	135	221	221	130	136	201	201	137	141	132	132	175	177
MH2693	Cameroon	10.733	3.34185	117	123	208	212	145	165	112	132	200	200	154	160	127	139	173	173	250	264	124	130	128	128	258	262	142	144	200	202	133	135	213	221	136	136	201	207	137	137	132	132	175	179
MH2707	Cameroon	10.7314	3.33992	109	117	208	208	149	165	132	132	200	210	152	160	127	129	175	175	256	264	124	124	128	136	258	272	142	144	198	202	135	135	221	221	128	136	201	207	137	141	132	132	165	175
NB0682	Cameroon	10.462	2.47027	109	121	214	226	145	155	124	132	200	220	156	160	133	133	161	173	256	262	124	124	124	126	258	262	142	152	200	220	125	127	215	223	128	128	199	199	137	137	120	120	169	179
NB1062	Cameroon	10.4176	2.2986	109	117	206	214	145	149	132	134	200	212	152	156	129	137	169	169	262	262	118	124	126	132	258	260	142	142	198	202	125	125	213	213	128	140	199	199	121	121	124	132	165	167
NK001	Cameroon	9.88065	2.31939	123	123	212	216	145	155	132	132	200	210	152	152	133	133	173	173	0	0	116	124	122	126	258	258	142	142	200	206	125	133	213	221	130	132	199	199	137	137	120	120	167	169
NK002	Cameroon	9.88091	2.3192	123	127	214	232	145	145	132	134	200	210	152	154	133	139	169	169	0	0	124	130	122	122	258	262	142	142	186	202	135	135	199	213	108	128	199	199	137	137	120	120	169	183
NK010	Cameroon	10.0472	2.40327	121	123	216	218	145	145	130	132	210	210	152	154	133	137	169	169	0	0	116	122	122	122	248	262	142	142	200	200	125	125	0	0	128	128	199	199	137	137	124	136	169	169
NK011	Cameroon	10.0496	2.4091	111	121	212	216	145	145	132	144	200	216	152	152	133	137	169	173	0	0	130	134	122	134	260	262	142	142	200	204	129	137	213	213	128	142	199	199	141	141	120	132	169	173
NK012	Cameroon	10.0409	2.3981	111	121	212	218	145	149	132	132	200	210	148	158	133	139	169	173	0	0	124	130	128	138	260	262	142	142	186	208	125	137	221	221	128	136	199	199	0	0	124	124	167	175
NK013	Cameroon	10.0472	2.39522	123	123	212	214	145	145	134	138	200	210	160	166	131	139	169	169	0	0	130	134	104	142	260	260	142	152	186	214	127	135	221	221	128	136	199	201	137	137	120	124	167	175
NK014	Cameroon	10.0532	2.40399	111	123	214	214	145	149	130	132	210	212	148	148	135	139	169	169	0	0	124	130	128	142	258	262	142	142	186	198	125	135	211	221	128	128	199	201	137	137	120	120	169	173
NK015	Cameroon	10.0528	2.40374	109	123	212	214	145	145	130	132	210	214	148	166	137	139	169	169	0	0	124	124	122	122	258	272	142	142	198	200	125	127	221	221	128	128	199	199	137	137	120	120	169	177
NK018	Cameroon	10.0493	2.39901	109	121	212	218	145	145	136	148	214	214	152	158	137	139	169	169	0	0	124	130	122	140	0	0	142	142	200	202	131	135	213	213	128	128	199	201	137	141	120	122	167	169
NK019	Cameroon	10.0429	2.39371	123	125	216	218	145	149	132	150	210	216	148	162	131	137	163	179	223	223	124	124	122	128	260	260	142	142	186	202	125	135	213	219	128	136	199	199	137	137	120	120	169	169
NK020	Cameroon	10.0426	2.39089	121	123	212	212	145	145	130	134	212	216	154	156	137	137	169	173	0	0	116	130	122	138	258	262	142	142	198	198	135	135	0	0	128	142	199	205	137	137	120	120	167	169
NK023	Cameroon	10.0523	2.39416	109	121	212	214	145	149	126	132	212	216	152	162	131	137	173	177	0	0	116	130	124	134	258	258	142	142	186	200	131	137	221	221	128	136	199	199	0	0	120	124	173	185
NK033	Cameroon	11.1746	2.79072	123	123	206	208	145	145	132	138	220	220	152	154	127	131	169	169	0	0	130	130	128	136	262	262	142	142	194	206	127	137	209	209	108	128	199	201	141	141	128	132	165	175
NK034	Cameroon	11.1746	2.79	109	117	208	208	145	155	132	138	200	220	152	156	131	139	173	173	0	0	116	130	122	122	258	262	142	142	198	198	131	133	209	221	108	108	201	201	121	141	120	134	175	177
NK035	Cameroon	11.1745	2.78941	109	117	208	208	145	155	138	138	200	214	152	154	127	139	173	177	0	0	116	116	122	122	258	262	142	142	198	202	131	135	221	221	108	128	199	201	121	121	120	132	169	175
NK036	Cameroon	11.1735	2.78791	109	117	208	212	149	149	130	130	200	218	152	154	137	139	169	173	0	0	130	130	122	122	260	272	142	142	198	198	135	137	221	221	128	128	199	201	121	121	124	132	175	177
NK037	Cameroon	11.173	2.78621	117	117	216	220	145	165	132	138	200	200	152	152	135	137	173	175	0	0	130	130	122	122	260	272	142	142	198	212	131	137	215	223	128	140	199	201	121	121	124	132	165	169
NK038	Cameroon	11.1737	2.78486	109	127	208	208	145	149	124	134	200	200	152	152	131	139	173	175	0	0	116	130	122	138	260	262	142	142	200	204	131	137	209	209	128	140	199	201	141	141	124	132	165	177
NK039	Cameroon	11.1645	2.79841	117	117	216	224	145	149	124	132	200	200	152	154	137	139	169	169	0	0	130	130	122	122	262	262	142	142	198	200	135	137	221	221	128	140	199	201	136	141	124	134	175	175
NK040	Cameroon	11.1619	2.79672	109	123	224	224	149	165	124	132	200	212	152	156	127	139	169	169	0	0	124	130	138	138	246	262	142	142	198	198	131	137	221	221	130	130	199	207	141	141	128	132	165	165
NK041	Cameroon	11.1577	2.79449	117	118	208	216	145	149	130	144	200	216	140	152	137	139	173	173	0	0	124	124	122	136	262	272	142	142	196	198	131	131	221	221	140	140	199	199	123	123	124	132	177	181
NK042	Cameroon	11.1576	2.79236	123	125	208	208	145	149	124	132	200	212	154	154	127	139	169	173	0	0	130	130	122	138	260	262	142	142	198	200	135	137	221	221	108	140	199	199	121	141	124	128	165	175
NK043	Cameroon	11.1497	2.79305	117	118	216	224	145	149	130	132	210	216	156	156	131	139	169	173	0	0	124	130	122	122	262	262	142	142	194	194	127	137	209	209	128	128	199	199	121	141	120	128	175	177
NK044	Cameroon	11.1525	2.78968	125	127	212	212	145	149	124	138	200	214	152	156	137	139	169	173	0	0	130	130	122	134	272	272	142	142	198	200	135	137	0	0	108	128	199	207	123	123	124	132	165	165
NK045	Cameroon	11.1571	2.79849	109	117	208	248	145	149	124	134	200	200	152	156	131	139	173	173	0	0	124	130	122	122	246	272	142	142	198	198	127	137	0	0	108	128	199	199	121	121	124	124	175	177
NK046	Cameroon	11.1579	2.80491	123	125	212	216	149	149	124	138	200	200	152	160	139	139	173	177	0	0	124	124	122	122	258	262	142	142	200	200	135	135	209	209	108	140	199	199	121	121	124	132	165	177
NK047	Cameroon	10.0309	3.20662	109	117	214	222	145	145	130	134	200	200	152	154	137	139	169	169	0	0	124	124	134	136	262	272	142	142	202	204	131	139	221	221	128	128	199	201	121	137	124	132	175	177
NK0572	Cameroon	9.98332	3.17113	117	117	214	216	145	149	0	0	200	212	152	156	121	131	169	175	256	264	124	134	136	138	260	260	142	142	200	208	133	137	221	221	130	130	199	201	141	147	120	120	175	175
NK0580	Cameroon	9.97835	3.17042	117	117	222	238	175	175	112	112	214	214	152	154	121	133	169	173	248	262	116	116	134	136	260	262	142	142	204	206	133	135	221	221	128	130	199	201	137	141	132	136	173	175
NK061	Cameroon	10.0388	3.19623	117	117	214	224	161	169	112	132	200	212	152	156	133	133	169	173	0	0	124	134	134	138	262	272	142	142	198	200	131	135	207	215	128	130	201	201	137	137	120	132	161	173
NK0620	Cameroon	9.98327	3.16971	114	114	206	214	149	149	100	104	200	200	152	152	129	133	183	183	256	264	124	134	124	134	246	262	142	142	196	200	135	135	215	223	128	128	201	201	121	137	120	124	171	173
NK0663	Cameroon	9.9838	3.18022	117	117	206	226	147	151	112	128	200	200	152	152	121	133	169	173	256	268	124	124	140	142	258	260	142	142	204	210	135	137	215	221	128	132	199	201	121	121	132	132	165	175
NK0665	Cameroon	9.99077	3.18821	109	117	208	224	145	145	130	132	200	214	154	156	127	131	169	183	256	268	116	128	124	124	260	262	142	142	196	204	133	137	207	221	130	130	199	209	142	142	120	120	165	175
NK0666	Cameroon	9.98963	3.18957	117	129	214	214	145	149	112	138	200	200	152	154	129	131	169	175	256	256	114	114	120	138	258	272	142	142	200	200	121	123	223	223	0	0	199	201	0	0	126	133	175	179
NK0667	Cameroon	9.99235	3.19382	117	117	206	226	145	147	112	112	200	200	152	152	127	129	173	175	256	256	124	130	126	138	260	262	142	142	194	198	133	139	215	221	128	128	199	199	121	135	132	132	173	173
NK0668	Cameroon	9.99229	3.19398	117	117	206	208	145	147	112	132	200	200	144	154	127	137	169	175	256	262	124	130	134	136	258	262	142	142	200	204	133	135	215	221	130	130	199	199	121	137	124	124	165	169
NK073	Cameroon	10.0105	3.18874	109	109	206	214	145	145	112	130	200	212	154	156	129	139	169	169	0	0	134	136	134	140	260	272	142	142	198	210	129	133	223	223	128	128	199	199	137	137	124	132	175	177
NK0740	Cameroon	10.1779	2.32373	111	123	208	216	145	155	124	124	200	212	152	152	129	137	169	173	256	260	116	118	122	126	258	260	142	142	200	202	125	131	213	213	133	133	199	199	137	137	120	136	169	169
NK075	Cameroon	10.0053	3.18771	109	117	206	214	157	161	112	130	214	214	158	168	133	139	173	175	0	0	124	128	128	136	262	262	142	142	200	200	133	137	207	221	124	128	199	199	121	121	120	132	175	185
NK0750	Cameroon	10.1775	2.32569	121	123	220	220	157	159	132	132	212	212	154	156	129	141	169	169	256	256	124	124	128	138	0	0	142	142	198	200	125	125	221	221	108	136	199	199	137	137	120	120	169	175
NK0790	Cameroon	10.177	2.33617	123	123	212	236	145	149	132	144	212	228	156	156	129	137	169	169	256	268	118	124	122	126	248	262	142	142	202	204	125	125	225	229	128	136	199	201	137	137	124	126	169	169
NK0820	Cameroon	10.1764	2.32441	109	121	212	220	145	145	132	136	200	214	152	154	133	137	169	169	258	264	116	118	128	136	260	260	142	142	202	210	125	127	221	221	128	128	199	205	137	137	120	136	169	169
NK083	Cameroon	10.0124	3.19842	117	133	222	224	145	149	112	132	200	200	144	162	131	137	175	175	0	0	124	124	134	136	260	272	142	142	198	198	133	135	207	207	124	128	199	199	123	137	124	132	175	175
NK0845	Cameroon	10.1751	2.3183	123	123	212	212	145	157	122	132	200	212	156	166	135	141	169	169	248	264	116	130	128	134	262	262	142	142	200	214	125	135	223	223	128	128	199	205	137	137	0	0	169	175
NK086	Cameroon	9.99837	3.19308	109	117	214	228	145	149	140	140	212	218	144	152	129	137	169	169	0	0	124	130	134	136	260	262	142	142	198	198	135	137	215	221	128	140	201	201	121	121	132	134	161	175
NK0875	Cameroon	10.1746	2.32744	111	123	212	220	149	149	132	132	214	218	152	156	133	137	169	173	256	262	124	124	126	126	258	262	142	142	200	202	127	135	221	221	136	136	199	199	139	139	122	122	169	169
NK0900	Cameroon	10.1756	2.33549	121	123	206	228	145	145	124	144	200	212	158	166	137	137	161	169	256	256	122	130	120	124	248	262	142	142	200	208	127	135	223	229	128	136	199	199	137	137	120	126	169	169
NK0950	Cameroon	10.1738	2.32921	111	123	212	212	145	155	130	136	214	218	152	160	129	137	163	169	256	260	124	128	136	136	260	262	142	142	186	198	125	131	221	221	128	128	199	205	137	137	124	124	169	169
NK100	Cameroon	9.99117	3.18562	117	127	214	228	145	145	112	112	200	212	144	152	127	131	173	177	0	0	124	134	136	136	260	260	142	142	194	198	131	135	215	221	124	128	199	199	121	137	132	132	175	177
NK1000	Cameroon	10.1726	2.33194	111	121	208	212	145	145	132	132	214	214	152	156	133	133	169	173	248	262	124	132	126	128	258	264	142	152	198	208	129	129	221	221	136	136	199	199	137	137	120	120	175	177
NK101	Cameroon	13.5707	2.24239	117	117	216	216	145	149	112	112	220	220	152	160	137	137	173	173	0	0	134	134	122	138	258	258	142	142	198	202	131	137	211	211	114	114	201	201	0	0	132	132	161	165
NK102	Cameroon	13.55	2.308	117	117	216	218	145	149	112	112	212	220	152	160	137	137	173	173	0	0	130	134	138	138	258	258	142	142	198	202	131	137	211	211	114	114	201	201	0	0	132	132	165	165
NK103	Cameroon	13.637	2.283	117	117	216	218	145	149	112	112	220	220	152	160	137	137	173	173	0	0	130	130	134	138	258	258	142	142	202	202	131	137	211	211	114	114	199	201	0	0	132	132	161	165
NK104	Cameroon	13.5685	2.23378	117	117	216	218	145	149	112	112	212	212	152	160	137	137	173	173	0	0	130	134	122	122	258	260	142	142	198	202	131	137	211	211	114	114	201	201	0	0	132	132	161	165
NK105	Cameroon	13.5704	2.23839	123	123	218	218	145	145	112	144	212	218	152	160	137	137	173	173	0	0	130	130	122	138	258	262	142	142	202	204	131	131	211	221	114	128	201	201	137	137	132	132	161	165
NK1050	Cameroon	10.1724	2.32298	123	123	206	212	145	145	132	140	200	210	156	162	131	137	169	169	256	264	116	124	116	116	258	262	140	140	198	210	127	135	221	221	128	132	199	199	137	137	120	124	169	173
NK106	Cameroon	13.5705	2.23975	121	123	212	218	145	145	112	112	200	212	152	152	137	137	173	203	0	0	130	130	122	138	258	262	142	142	202	204	131	131	211	221	114	128	201	205	0	0	132	132	161	165
NK107	Cameroon	13.5678	2.23894	117	123	216	218	145	149	112	144	212	220	152	160	137	137	173	173	0	0	130	134	122	138	262	262	142	142	202	202	131	137	221	221	114	114	199	201	0	0	124	132	161	169
NK1075	Cameroon	10.1719	2.32062	121	123	212	226	145	149	132	132	200	200	152	152	131	139	169	173	248	256	116	124	116	124	259	262	140	140	202	210	127	129	221	221	108	132	199	205	137	139	120	120	169	179
NK108	Cameroon	13.5704	2.41136	117	117	216	216	145	145	112	132	212	220	152	152	137	137	173	173	0	0	124	124	138	138	258	262	142	142	202	202	133	141	211	221	114	130	201	201	0	0	135	135	165	165
NK109	Cameroon	13.572	2.24172	117	117	216	216	145	145	112	132	220	220	152	152	137	137	173	173	0	0	124	130	138	138	258	258	142	142	202	202	137	137	211	211	128	128	201	201	0	0	132	132	165	165
NK110	Cameroon	13.5743	2.23918	117	123	216	218	145	149	112	112	220	220	152	160	137	137	173	173	0	0	124	130	134	138	258	258	142	142	198	202	131	137	211	221	114	140	201	201	0	0	132	132	165	165
NK1100	Cameroon	10.1715	2.32172	111	117	220	226	145	149	132	132	200	212	148	156	137	139	163	169	256	256	122	124	122	122	262	262	140	140	200	202	125	127	221	221	118	132	199	199	137	139	120	120	165	169
NK111	Cameroon	13.5693	2.2356	117	117	216	218	149	149	112	112	220	220	152	152	137	137	173	173	0	0	130	134	122	138	258	258	142	142	198	198	131	137	211	211	114	114	201	201	0	0	132	132	161	165
NK112	Cameroon	13.409	2.232	117	117	218	218	149	149	112	112	220	220	152	160	137	137	173	205	0	0	130	134	122	122	258	258	142	142	198	202	131	137	211	211	114	114	199	201	0	0	132	132	165	165
NK113	Cameroon	13.5606	2.24025	117	123	216	218	145	149	112	112	220	220	152	152	137	137	173	173	0	0	0	0	122	138	258	258	142	142	198	198	131	137	211	221	114	114	201	201	0	0	124	132	161	165
NK114	Cameroon	13.5623	2.24488	117	123	216	216	145	149	112	132	212	220	152	152	137	137	173	173	223	223	124	134	122	138	262	262	142	142	202	202	131	131	211	221	114	130	201	201	137	137	124	132	165	169
NK115	Cameroon	13.5712	2.23403	117	117	216	216	149	149	112	112	200	220	152	160	137	137	173	173	0	0	130	134	122	138	258	260	142	142	202	202	131	131	211	211	114	114	201	201	137	137	132	132	165	165
NK116	Cameroon	13.5714	2.22986	117	117	216	218	149	163	112	112	220	220	160	160	137	137	173	205	0	0	130	134	138	138	258	258	142	142	198	204	131	135	211	221	114	114	201	201	137	137	132	132	165	165
NK117	Cameroon	13.5632	2.23235	117	117	216	218	149	149	112	112	212	220	152	152	137	137	173	173	0	0	130	134	122	138	258	258	142	142	202	204	131	137	211	211	114	114	199	201	0	0	132	132	161	165
NK118	Cameroon	13.5676	2.24537	123	123	216	216	145	145	112	132	214	220	152	152	137	137	173	205	0	0	124	134	138	138	258	258	142	142	202	202	131	131	211	221	140	140	201	201	137	137	132	132	165	165
NK119	Cameroon	13.5695	2.23452	117	117	218	218	145	149	112	112	220	220	152	160	137	137	173	205	0	0	134	134	122	138	258	258	142	142	198	202	131	131	211	211	114	114	201	201	137	137	132	132	165	165
NK120	Cameroon	13.6177	2.24883	117	117	216	218	145	145	112	112	220	220	152	152	137	137	173	205	0	0	130	130	122	138	258	258	142	142	198	198	131	131	211	211	114	114	201	201	137	137	132	132	161	165
NK1200	Cameroon	10.1681	2.32016	123	123	210	212	145	145	132	132	200	212	152	166	131	133	169	169	256	264	124	132	126	128	260	262	142	142	198	202	125	127	221	221	108	133	199	199	137	137	124	124	167	169
NK121	Cameroon	13.5697	2.24083	117	123	216	218	149	149	112	112	200	212	152	160	137	137	173	173	0	0	124	130	122	138	260	262	142	142	194	202	137	137	211	215	0	0	199	201	121	121	120	132	161	165
NK122	Cameroon	13.5692	2.40475	117	123	216	216	149	149	112	112	200	220	152	152	137	137	173	205	0	0	120	130	122	138	258	258	142	142	202	202	137	137	211	221	128	130	201	201	121	121	120	132	161	165
NK1225	Cameroon	10.1676	2.33613	123	123	212	218	145	159	132	132	200	216	154	154	133	133	169	169	254	256	122	124	122	122	258	260	142	142	200	210	125	127	215	221	136	144	199	199	137	141	120	132	169	175
NK123	Cameroon	13.5669	2.24257	123	123	216	216	145	149	112	112	200	214	152	160	137	137	173	173	0	0	124	134	122	138	258	262	142	142	202	202	137	137	211	211	114	114	201	201	0	0	132	132	161	165
NK124	Cameroon	11.4501	3.43584	123	129	208	212	165	165	132	132	200	214	148	152	135	135	169	169	0	0	124	134	138	138	258	262	142	142	200	202	129	139	209	209	133	136	201	201	141	141	135	135	165	175
NK125	Cameroon	11.437	3.42672	109	109	208	218	149	155	112	138	212	212	152	164	139	141	173	175	0	0	124	124	126	134	260	260	142	142	200	200	135	137	223	225	128	130	201	201	0	0	124	132	165	175
NK1251	Cameroon	10.1676	2.32827	109	111	212	212	145	145	112	124	212	216	148	162	135	137	169	173	256	264	116	128	126	128	259	260	142	142	186	202	127	127	0	0	132	132	199	199	137	137	120	122	167	169
NK126	Cameroon	11.4491	3.43683	117	125	208	218	155	155	112	132	200	200	152	152	135	139	169	175	0	0	124	130	128	128	260	260	142	142	200	200	135	135	219	219	128	132	201	201	121	137	120	132	165	165
NK127	Cameroon	11.4495	3.43611	117	125	218	222	145	149	112	112	200	214	152	162	127	137	173	173	0	0	124	130	122	134	258	264	142	142	186	200	135	137	219	221	128	130	201	201	121	121	124	128	165	175
NK128	Cameroon	11.4384	3.4315	109	125	228	236	149	149	112	112	200	212	152	152	137	139	169	175	0	0	124	130	128	138	258	262	142	142	194	200	137	137	209	215	132	132	199	199	121	121	119	119	175	177
NK129	Cameroon	11.438	3.43898	129	129	218	228	145	149	132	138	200	200	152	152	137	139	171	175	0	0	120	130	128	128	258	258	142	142	202	202	135	137	215	221	132	134	201	201	121	121	120	132	157	161
NK130	Cameroon	11.4381	3.43272	109	123	208	208	165	165	112	112	200	200	152	152	127	127	175	175	0	0	126	126	122	138	258	260	142	142	186	200	131	137	209	215	128	132	199	201	121	121	120	132	157	175
NK131	Cameroon	11.4381	3.43262	109	125	222	228	145	149	112	112	200	212	152	152	127	127	175	175	0	0	124	124	138	138	262	262	142	142	186	198	137	137	215	221	124	132	201	201	121	121	120	132	157	175
NK133	Cameroon	11.4389	3.43499	117	123	218	230	145	145	112	112	200	200	152	152	127	127	169	175	0	0	130	130	138	138	258	260	142	142	186	200	135	137	215	221	124	132	199	199	121	121	120	132	157	175
NK143	Cameroon	11.4389	3.4414	109	125	220	244	149	149	112	132	200	214	152	152	137	137	169	175	0	0	124	130	136	136	258	262	142	142	200	206	131	137	221	221	130	132	201	201	121	121	120	120	165	165
NK152	Cameroon	11.4403	3.43706	109	125	218	234	145	145	132	138	200	200	154	156	137	141	171	175	0	0	120	130	128	128	258	258	142	144	200	202	135	135	215	221	130	132	201	201	121	137	120	132	157	161
NK1621	Cameroon	11.4518	3.43129	109	129	228	234	155	155	132	138	200	212	152	152	127	131	175	175	256	256	124	130	136	138	259	262	142	142	194	202	127	135	221	223	128	132	201	201	137	137	120	120	0	0
NK1622	Cameroon	11.4522	3.43021	109	109	208	228	149	155	112	138	212	212	148	152	133	139	173	177	0	0	124	124	136	136	258	262	142	142	194	200	135	137	219	219	114	130	201	201	121	121	128	128	161	161
NK1623	Cameroon	11.45	3.43041	129	129	208	236	145	155	112	138	212	212	152	152	127	127	173	177	256	256	124	130	136	136	258	262	142	142	194	200	133	137	219	219	130	130	201	201	121	135	128	132	161	169
NK205	Cameroon	11.4405	3.42682	109	125	218	228	155	155	112	132	200	212	152	164	137	137	173	175	256	258	124	124	138	138	258	260	142	142	186	202	135	137	221	221	128	130	199	201	121	141	120	132	175	175
NK222	Cameroon	11.4361	3.43304	125	125	208	248	155	155	112	132	200	200	152	164	139	139	175	175	256	256	124	124	128	138	258	262	142	142	200	200	131	135	209	221	130	132	201	201	137	137	120	132	175	175
NK286	Cameroon	11.4431	3.43575	123	125	208	228	149	149	112	134	200	200	152	152	127	137	175	175	0	0	124	124	122	122	258	258	142	142	200	202	137	137	215	215	130	132	199	201	0	0	120	120	175	175
NK300	Cameroon	11.4426	3.43866	109	129	208	218	149	155	0	0	214	214	152	152	139	139	173	175	0	0	130	134	128	128	258	258	142	142	186	200	135	137	215	221	132	132	199	201	0	0	120	120	175	175
NK343	Cameroon	11.4443	3.43286	123	129	208	208	145	165	112	112	200	200	152	152	127	139	175	175	0	0	124	124	136	136	258	262	142	142	200	202	131	161	209	221	128	132	201	201	121	137	120	120	175	175
NK380	Cameroon	11.4465	3.43546	109	117	212	212	155	165	132	134	200	200	152	154	135	139	169	175	0	0	124	124	128	128	258	258	142	142	200	202	127	135	221	223	124	132	199	199	137	137	120	132	165	175
NK400	Cameroon	11.4478	3.44075	109	117	212	228	155	155	112	132	200	200	152	152	139	139	173	177	256	256	124	124	0	0	258	260	142	142	200	200	135	135	215	223	132	136	199	201	121	121	120	132	157	157
NK500	Cameroon	11.4648	3.43786	109	125	216	218	145	163	0	0	200	220	152	152	137	141	169	173	250	256	124	128	128	138	258	260	142	142	194	204	131	137	219	219	114	128	201	201	0	0	120	120	157	157
NK503	Cameroon	11.4648	3.4379	109	109	212	248	149	175	112	140	200	200	152	160	127	133	169	175	256	256	124	128	128	138	260	264	142	142	200	206	131	135	223	223	128	128	201	201	121	121	120	120	157	157
NK504	Cameroon	11.465	3.43783	125	125	214	248	145	155	112	130	212	220	152	162	133	141	169	173	256	256	128	128	136	138	262	262	142	142	194	200	131	131	223	223	128	128	201	201	121	121	120	132	157	157
NK680	Cameroon	11.4505	3.43595	117	117	228	228	145	149	112	112	200	212	152	164	139	141	175	175	256	256	124	124	136	136	260	260	142	142	200	200	135	137	219	223	128	132	199	201	121	121	124	132	165	165
NK698	Cameroon	11.1579	2.79411	117	127	208	212	145	165	140	144	200	200	156	156	127	139	169	173	0	0	124	130	122	122	258	272	142	142	198	200	131	135	221	221	140	141	199	199	123	123	124	124	165	165
NK830	Cameroon	10.1761	2.33047	121	123	212	212	149	155	134	138	200	212	154	156	127	139	169	169	258	264	116	124	126	126	258	258	142	142	200	202	125	127	213	221	128	133	205	205	137	137	136	136	163	169
NKA15	Cameroon	8.86339	5.01471	129	129	230	230	143	145	126	130	200	212	156	156	133	137	169	169	0	0	132	132	136	136	0	0	142	142	0	0	135	135	0	0	128	132	199	199	121	121	136	136	163	163
NKA16	Cameroon	8.86339	5.09151	109	129	230	230	157	157	126	130	212	212	154	156	139	139	169	169	0	0	132	132	134	136	0	0	142	142	202	206	135	135	223	223	140	140	199	199	121	137	136	136	165	165
NKA17	Cameroon	8.76339	5.08101	109	129	232	232	155	155	126	130	212	212	154	156	139	139	169	175	0	0	132	132	134	134	0	0	142	142	0	0	135	135	221	223	128	140	199	199	137	137	136	136	163	165
NKA18	Cameroon	8.54339	5.10104	109	109	230	232	157	157	126	126	200	200	156	156	139	139	169	169	0	0	132	132	134	134	0	0	142	142	202	202	135	135	221	221	132	140	199	199	137	137	136	136	163	163
OH0876	Cameroon	10.4642	3.1396	109	121	208	226	149	149	132	134	214	214	152	156	131	137	0	0	0	0	124	134	136	136	0	0	142	142	0	0	131	135	221	221	128	140	199	199	121	137	132	132	0	0
OH0910	Cameroon	8.8307	5.0365	109	129	230	236	155	155	130	130	212	212	154	156	137	139	169	175	0	0	116	132	134	134	0	0	142	142	202	204	135	135	221	223	128	130	199	199	121	137	136	136	163	165
OH0913	Cameroon	8.8568	5.0664	109	109	230	230	157	157	126	126	212	212	156	156	139	139	169	169	250	262	132	132	134	134	262	262	142	142	204	204	135	135	221	221	128	140	199	199	137	137	136	136	163	163
OH1254	Cameroon	10.28	3.1832	109	117	214	224	149	155	130	132	200	220	152	166	127	137	169	175	268	268	124	126	134	138	0	0	142	142	200	206	129	135	221	223	108	128	199	199	121	137	132	134	177	177
OH1942	Cameroon	9.89081	3.57294	117	127	0	0	145	145	132	134	212	212	152	152	121	133	0	0	0	0	126	126	134	136	0	0	142	142	0	0	139	139	221	221	128	128	199	199	121	137	132	136	175	175
OH1944	Cameroon	9.87969	3.57928	117	125	220	220	145	171	112	132	200	212	152	162	133	133	173	177	0	0	116	126	136	136	0	0	142	142	202	204	139	139	215	223	122	122	199	199	137	137	124	132	165	169
OH1945	Cameroon	9.90669	3.58856	125	125	220	222	155	163	112	130	200	212	152	152	131	131	169	173	256	256	126	126	138	138	0	0	142	142	202	208	131	139	223	227	128	136	199	205	137	137	132	132	165	165
OH1951	Cameroon	9.98198	3.07565	117	117	212	220	145	161	112	132	200	220	152	154	133	139	175	175	256	262	124	132	136	138	262	262	142	142	192	204	133	135	0	0	128	130	199	201	137	137	124	132	175	175
OH3672	Cameroon	10.9728	2.68361	117	117	208	216	149	159	132	138	212	212	156	156	131	139	169	173	256	260	124	126	126	132	246	262	142	142	198	212	125	127	221	221	140	140	199	199	121	141	120	120	167	177
OH3718	Cameroon	10.8028	2.52639	117	123	212	216	145	145	112	124	210	214	152	156	133	139	173	173	256	256	124	130	122	128	272	272	142	152	200	202	131	135	215	215	108	128	199	199	121	137	120	120	169	177
OH3719	Cameroon	10.8294	2.54028	121	121	208	236	145	159	112	138	200	212	156	156	131	139	161	173	256	256	124	124	128	128	260	262	142	152	186	200	129	129	209	215	108	128	199	199	121	137	120	120	169	175
OH4835	Cameroon	9.8612	2.35119	121	123	216	232	145	153	132	136	210	210	148	152	133	139	161	163	256	264	130	130	126	138	262	262	142	152	186	186	133	135	213	213	118	130	199	201	137	137	120	120	165	169
OH4836	Cameroon	9.8613	2.35137	117	123	216	226	149	149	132	132	210	210	156	160	133	135	169	169	256	256	124	124	126	140	260	262	142	142	198	200	125	135	215	221	108	128	199	199	121	137	120	124	169	175
OH4837	Cameroon	9.86124	2.35189	121	123	206	212	149	149	132	132	200	218	156	156	133	135	161	163	256	268	124	124	126	126	246	262	142	142	200	206	129	137	213	215	118	128	199	199	123	123	120	124	165	173
OH4838	Cameroon	9.94986	2.28504	117	117	206	214	145	145	124	130	214	216	156	156	133	133	163	169	256	262	116	118	122	128	258	258	142	142	186	210	125	125	213	221	108	134	199	199	121	137	120	120	163	167
OH4839	Cameroon	9.95568	2.30796	117	125	212	212	149	149	130	130	210	212	152	152	137	139	163	173	256	256	124	130	122	126	248	248	142	142	200	202	125	127	213	219	128	136	199	205	135	137	120	120	169	169
OH4840	Cameroon	9.96191	2.32882	117	121	212	212	147	149	130	132	212	214	148	162	131	133	173	173	264	266	116	124	122	128	252	262	142	142	202	206	125	135	213	221	108	128	199	199	137	139	120	134	165	169
OH4841	Cameroon	9.93779	2.33694	125	125	214	222	145	149	112	124	212	218	156	166	133	139	169	173	256	266	124	130	122	126	246	260	142	152	200	202	133	135	227	227	128	128	199	199	137	137	120	120	169	171
OH4843	Cameroon	10.0243	2.39541	117	123	206	216	145	149	126	132	200	212	152	154	133	137	169	177	256	258	124	124	128	136	262	262	142	142	202	212	131	135	215	221	130	136	199	199	137	137	120	120	169	173
OH4844	Cameroon	10.2091	2.34133	111	121	206	210	149	159	132	144	210	212	152	154	133	141	163	169	256	256	116	128	128	140	260	260	142	142	200	202	125	127	221	221	132	133	199	199	137	137	120	120	169	171
OH4845	Cameroon	10.2143	2.34254	117	117	214	218	149	149	122	144	212	214	154	162	137	137	169	169	256	256	122	128	126	126	0	0	142	142	202	202	125	131	213	221	128	132	199	199	121	137	120	124	175	175
OH4846	Cameroon	10.359	2.40913	111	123	212	222	145	145	132	132	200	212	158	162	127	137	163	169	256	264	118	130	128	128	262	262	142	142	202	208	125	125	215	221	128	133	199	199	121	127	120	120	169	183
OH6729	Cameroon	10.0889	4.3209	117	125	218	224	151	165	130	138	200	200	152	156	133	137	169	171	248	250	126	126	134	138	260	272	142	142	200	202	135	135	213	219	122	128	199	199	121	137	132	132	165	175
OH6730	Cameroon	9.87703	4.56456	109	117	208	224	145	149	130	134	212	212	152	154	137	139	169	169	268	268	124	134	138	142	258	258	142	142	202	202	135	135	219	223	128	136	201	209	137	137	132	132	175	175
SVO0102	Cameroon	12.4961	3.29512	121	123	214	214	145	145	124	124	200	212	152	164	133	147	179	179	256	256	124	128	128	136	272	272	142	142	200	200	125	127	225	225	123	130	199	199	137	137	120	120	167	169
TOD0462	Cameroon	10.4688	4.56035	117	123	216	234	145	145	130	138	200	200	152	154	139	145	169	169	0	0	116	124	140	140	0	0	142	142	202	204	129	135	221	223	122	128	201	201	137	137	124	124	161	165
TOD0471	Cameroon	10.4779	4.55551	117	125	222	234	145	155	132	132	200	212	152	152	131	131	175	177	250	256	124	124	140	140	0	0	142	142	202	202	135	135	221	221	122	122	199	201	121	137	132	132	175	175
TOD0487	Cameroon	9.80667	3.62615	109	109	226	226	151	155	112	138	198	212	156	160	133	137	169	177	256	264	128	128	122	136	0	0	142	142	192	208	135	137	221	221	128	130	199	199	0	0	132	132	165	177
TOD0513	Cameroon	10.1132	3.64936	127	133	216	216	145	155	112	132	200	200	152	154	121	129	169	169	248	258	124	124	126	134	258	264	142	142	200	202	135	137	207	221	130	130	199	201	0	0	124	132	175	177
TOD0535	Cameroon	10.174	2.82587	117	123	216	220	145	145	130	132	200	212	152	152	131	139	169	177	256	262	124	134	136	138	252	252	142	142	200	200	133	135	221	223	128	128	201	207	121	137	132	132	175	175
TOD0538	Cameroon	10.1768	2.84593	123	123	214	236	145	145	130	132	212	214	144	152	121	141	169	173	256	264	124	130	122	128	262	264	142	142	186	202	133	135	217	223	108	108	199	201	121	137	120	132	165	173
TOD0561	Cameroon	10.4421	3.39789	109	125	214	220	155	165	112	136	200	202	154	166	129	137	169	169	256	256	124	124	122	140	258	258	142	142	200	200	139	139	207	221	128	132	199	201	137	141	120	136	161	175
TOD0586	Cameroon	10.6626	3.45769	129	129	222	234	155	165	112	138	200	202	160	160	133	135	169	173	256	256	124	130	134	136	258	258	142	142	198	204	131	135	221	221	136	136	199	201	121	137	132	132	175	177
TOD0650	Cameroon	10.583	3.23564	117	121	208	220	145	145	112	134	200	220	152	152	135	137	169	173	248	256	130	134	138	138	246	258	142	142	202	202	131	137	221	221	114	132	199	199	0	0	132	132	165	175
TOD0681	Cameroon	10.5829	3.23019	117	123	218	222	145	155	112	132	200	220	152	160	137	139	169	169	248	248	124	130	134	138	262	272	142	142	196	202	135	139	221	221	108	130	199	201	121	137	132	132	165	165
TOD0708	Cameroon	10.4277	3.11636	117	125	208	236	149	155	124	134	200	212	156	160	133	139	169	169	248	256	116	124	138	144	262	262	142	142	202	202	133	135	215	221	108	130	199	201	121	137	132	138	175	175
TOD0734	Cameroon	10.4273	3.11664	117	125	208	212	145	149	130	134	200	214	158	160	133	139	169	169	248	256	124	124	138	138	0	0	142	142	202	202	133	137	221	221	108	130	199	201	121	121	132	132	0	0
TOD1588	Cameroon	9.10066	4.43439	125	129	222	230	145	157	126	130	200	212	154	158	139	139	169	175	250	278	116	132	134	134	246	272	142	142	202	202	135	135	221	225	128	132	199	201	121	121	132	132	173	175
TOD1604	Cameroon	9.09761	4.43171	129	129	208	230	145	155	130	130	200	210	154	158	139	139	169	169	258	266	116	132	134	136	272	272	142	142	202	202	135	135	223	225	128	128	199	199	121	121	124	124	163	163
TOD1615	Cameroon	9.09192	4.43266	109	109	206	230	142	145	130	130	200	212	154	158	129	139	169	169	250	262	132	132	134	136	0	0	142	142	202	208	135	135	209	209	128	130	199	199	121	137	120	136	163	163
TOD1622	Cameroon	9.09116	4.43257	109	129	208	230	157	157	126	130	212	212	156	156	129	129	169	169	258	262	116	116	134	136	246	246	142	142	202	206	135	135	221	221	128	132	199	199	137	137	124	136	177	177
BR39	Equatorial Guinea	9.61917	1.58722	121	123	214	222	145	155	130	136	200	214	148	148	133	141	169	173	250	258	124	124	126	126	0	0	142	142	186	202	125	127	211	229	128	128	199	205	137	137	120	120	167	169
BR40	Equatorial Guinea	9.8375	1.80278	121	123	212	214	145	149	130	134	210	210	154	154	0	0	0	0	0	0	0	0	0	0	0	0	142	142	0	0	129	129	0	0	0	0	0	0	137	137	120	120	0	0
NKA1	Equatorial Guinea	10.0667	1.5	117	121	0	0	149	149	132	134	0	0	0	0	129	131	0	0	0	0	128	134	126	134	0	0	142	142	0	0	125	129	0	0	122	130	0	0	0	0	120	120	0	0
NKA2	Equatorial Guinea	9.61667	1.35	111	121	0	0	0	0	126	130	0	0	0	0	131	141	169	169	0	0	124	124	126	126	0	0	0	0	202	202	125	129	0	0	0	0	0	0	137	137	120	124	0	0
NKA3	Equatorial Guinea	10.3	1.65	121	123	0	0	145	149	130	132	210	210	156	160	133	133	165	169	0	0	116	124	126	126	0	0	142	142	186	200	135	135	0	0	118	122	199	199	137	137	120	124	0	0
NKA5	Equatorial Guinea	10.0369	1.5982	123	131	212	216	145	157	130	132	210	210	156	160	131	139	169	169	264	264	124	124	126	126	0	0	142	142	200	206	127	129	209	213	108	128	199	205	137	137	120	120	167	169
NKA6	Equatorial Guinea	10.3167	1.56667	121	125	214	218	145	145	132	138	210	210	156	158	133	147	165	173	0	0	124	128	126	126	0	0	142	142	202	204	123	127	217	225	116	118	199	205	137	137	120	124	167	167
NKA7	Equatorial Guinea	10.0408	1.41667	121	123	212	212	143	149	124	130	210	210	148	150	129	139	169	169	0	0	124	124	126	126	0	0	142	142	200	200	127	135	0	0	128	128	199	199	139	141	120	124	0	0
BR23	Gabon	12.8558	0.37369	117	117	212	218	143	143	128	134	210	210	152	154	129	129	169	177	260	262	130	134	126	126	0	0	142	142	202	204	127	127	217	221	108	108	199	205	137	137	120	124	165	175
BR24	Gabon	11.8078	-1.167	117	117	212	212	142	143	110	136	210	210	154	154	129	143	0	0	0	0	124	124	122	126	0	0	152	152	0	0	135	135	215	217	122	128	205	205	137	137	124	124	169	171
BR25	Gabon	9.88333	-1.78333	121	121	207	212	143	163	132	134	202	204	154	154	129	137	169	175	0	0	124	136	124	126	0	0	152	152	180	186	127	131	219	219	108	122	199	205	136	136	120	120	169	177
CD0153b	Gabon	10.1558	-0.90107	121	121	212	212	142	143	138	138	216	216	156	158	131	137	169	169	258	260	122	122	124	124	256	256	152	152	200	200	137	139	217	227	122	122	205	205	137	137	120	124	175	175
CD0165	Gabon	9.96545	-1.14887	125	125	212	216	142	143	132	136	214	218	154	156	133	139	169	169	262	264	124	144	124	126	262	270	152	152	186	194	123	137	217	219	108	122	205	205	137	144	120	124	169	177
CD0172	Gabon	9.76126	-0.63564	121	123	0	0	143	143	132	132	212	212	154	158	137	139	169	171	262	262	124	132	124	128	262	272	152	152	186	192	139	139	207	207	108	108	205	205	115	137	120	124	169	169
CD0197	Gabon	9.42425	-1.13444	123	125	212	212	143	169	132	132	200	202	154	156	139	147	169	169	258	260	124	124	126	126	256	256	153	153	192	198	131	137	221	221	108	108	195	205	137	137	120	120	177	177
CD0223	Gabon	10.1816	-1.70243	121	121	212	218	143	143	132	134	210	214	146	156	123	131	173	173	260	266	132	142	124	124	256	262	152	152	186	192	131	137	221	221	124	124	195	205	137	144	120	120	161	169
CD0259	Gabon	9.91158	-1.7421	121	121	212	216	143	143	132	132	208	208	154	158	135	139	173	179	262	264	124	132	124	126	258	258	153	153	186	186	127	145	217	217	108	157	205	205	137	137	120	120	169	171
CD0294	Gabon	10.4842	-2.01158	121	131	207	216	159	167	114	132	202	202	146	154	123	123	175	175	248	256	130	132	124	126	276	280	153	153	180	186	133	141	217	221	108	138	195	195	0	0	120	120	167	177
CD0303	Gabon	10.578	-1.99141	131	131	207	207	167	167	114	114	202	202	146	154	123	123	175	175	248	262	132	132	124	126	276	276	153	153	180	180	133	147	223	223	108	124	195	195	0	0	122	122	177	177
CD0318	Gabon	10.6351	-1.96135	105	131	207	212	143	143	114	114	202	210	146	154	129	139	171	175	248	248	132	132	124	126	276	276	153	153	180	202	141	141	219	223	108	124	195	195	131	131	120	120	177	177
CD0338	Gabon	10.4817	-1.47455	105	121	212	212	142	143	132	134	210	216	152	158	123	139	169	169	256	256	124	130	124	124	0	0	152	152	186	186	129	135	0	0	108	108	205	205	137	137	120	124	0	0
CD0341	Gabon	10.5993	-1.36546	121	123	212	212	143	143	132	138	210	210	156	158	135	135	169	173	0	0	122	124	126	128	0	0	152	152	192	200	127	127	217	217	122	122	205	205	137	137	124	124	0	0
CD0345	Gabon	10.6079	-1.37595	121	121	212	212	142	142	132	134	210	210	152	154	129	135	169	169	260	262	124	128	124	126	0	0	152	154	192	200	127	137	219	219	108	122	199	205	0	0	124	124	167	167
CD0371	Gabon	9.57709	0.93983	121	121	212	230	145	147	132	134	210	212	154	154	139	139	171	173	264	264	122	128	124	124	246	262	142	142	198	200	127	143	221	221	108	123	199	199	137	137	120	120	167	169
CD0374	Gabon	9.56637	0.92816	117	117	204	214	145	147	126	132	212	222	152	154	131	133	169	173	262	262	124	124	126	126	246	246	142	142	186	204	127	135	223	223	108	108	199	199	137	142	120	120	169	171
CD0397	Gabon	9.87711	-0.39111	117	117	212	212	143	143	136	138	212	218	154	158	139	141	191	193	248	262	124	132	124	124	246	256	144	152	186	186	125	127	221	221	108	130	205	205	137	141	120	120	169	171
CD0405	Gabon	9.87595	-0.39314	117	121	212	212	143	143	132	136	204	208	154	160	137	141	171	173	256	262	124	126	124	126	246	246	152	152	186	186	127	137	0	0	108	130	205	205	115	115	120	124	169	173
CD0416	Gabon	9.84343	-0.10252	121	121	214	220	143	143	132	134	200	216	154	162	137	137	163	173	262	262	126	128	124	128	260	260	142	152	192	200	127	133	0	0	108	108	203	205	137	137	120	120	167	167
CD0435	Gabon	9.58788	-0.13198	121	121	212	212	145	151	130	132	210	212	154	156	137	139	171	173	256	262	122	128	126	126	0	0	142	157	186	188	127	135	229	229	108	108	205	205	137	137	120	120	167	169
CD0441	Gabon	9.51358	-0.13447	121	121	214	216	143	145	134	136	218	220	152	152	139	145	173	201	256	258	124	124	126	126	0	0	142	152	186	186	133	137	225	229	108	128	199	199	136	141	120	120	169	171
CD0473	Gabon	11.1225	-2.68671	105	125	207	207	143	165	114	114	202	202	146	156	123	129	175	175	0	0	130	130	124	126	0	0	152	152	180	180	135	143	0	0	108	120	195	205	137	137	122	122	177	177
CD0489	Gabon	11.1452	-3.28083	105	129	207	207	151	159	114	114	202	202	154	154	123	129	0	0	258	258	124	124	124	124	0	0	0	0	180	180	135	143	215	227	110	128	195	195	133	133	122	124	177	177
CD0516	Gabon	11.1487	-3.27165	105	129	207	207	165	165	114	114	202	202	154	160	123	123	179	179	0	0	132	132	124	124	0	0	0	0	180	180	143	147	215	223	128	128	195	195	133	137	122	124	177	177
CD0520	Gabon	11.1374	-3.28417	105	129	207	207	149	159	114	114	202	202	154	154	123	123	179	179	248	258	132	138	124	124	0	0	150	154	180	180	133	143	217	223	110	128	195	195	0	0	122	124	157	177
CD0580	Gabon	11.163	-2.90458	105	131	207	207	143	165	114	114	202	202	146	146	123	131	179	179	258	260	132	138	124	124	276	276	153	153	180	180	135	135	227	227	122	140	195	195	133	133	122	122	177	177
CD0615	Gabon	11.3978	-3.03886	105	129	207	207	142	165	114	114	202	202	156	156	123	129	0	0	258	258	134	134	124	124	0	0	153	153	180	180	135	143	211	211	128	128	195	205	133	133	122	122	177	177
CD0667	Gabon	10.5321	-2.42614	129	129	207	207	143	169	114	114	202	202	146	154	123	131	0	0	248	248	130	138	124	124	0	0	153	153	180	180	131	137	219	219	108	122	195	195	0	0	120	122	0	0
CD0669	Gabon	10.5315	-2.4287	105	137	207	207	169	169	114	114	202	202	154	154	131	131	171	171	248	248	122	132	124	124	0	0	154	156	180	180	135	141	219	233	108	140	195	195	131	131	122	122	167	177
CD0684	Gabon	10.542	-2.42241	105	131	207	207	169	169	114	114	202	202	156	158	131	131	173	173	248	258	130	138	124	126	276	276	153	153	180	180	131	131	213	219	138	138	195	205	0	0	120	122	177	177
CD0742	Gabon	10.5825	-1.40667	121	121	212	220	142	142	134	134	210	210	152	156	129	129	173	173	260	270	122	124	126	126	258	258	142	152	192	200	127	137	223	223	108	122	205	205	0	0	120	124	171	171
CD0757	Gabon	10.5705	-1.40743	121	123	212	218	142	142	128	140	210	210	154	156	129	129	187	187	264	266	122	134	124	126	0	0	152	152	186	200	127	127	217	217	108	108	203	205	137	137	120	120	0	0
CD0770	Gabon	10.5655	-1.40043	121	123	212	212	143	143	124	134	210	210	154	156	131	139	169	173	0	0	122	124	124	126	0	0	142	142	192	200	121	137	0	0	122	122	203	205	0	0	120	124	0	0
ChM0007	Gabon	12.9718	-0.733111	117	121	212	212	143	143	134	134	194	216	152	156	129	129	171	193	248	262	124	126	126	126	0	0	142	152	200	204	125	135	217	217	108	124	203	205	137	137	120	124	169	169
ChM0008	Gabon	12.9706	-0.729322	121	123	216	216	143	143	134	134	210	210	156	156	129	129	171	171	262	262	126	134	126	126	258	258	152	152	200	204	123	135	217	217	108	108	199	199	115	127	120	120	167	177
ChM0009	Gabon	12.9722	-0.731484	117	123	212	216	143	143	134	134	210	216	152	156	129	129	171	193	248	262	126	126	124	124	262	262	152	152	200	200	123	135	0	0	108	108	199	205	125	125	120	120	169	171
GiD0335	Gabon	10.1718	-1.7892	117	121	212	212	143	165	136	142	200	212	152	154	129	143	169	169	260	266	132	132	126	126	256	262	152	152	186	186	135	135	217	217	108	108	205	205	137	137	120	124	167	177
GiD0820	Gabon	9.3346	0.5787	117	123	226	236	145	147	132	134	212	212	156	156	137	145	169	173	258	262	122	122	124	126	0	0	142	142	186	200	131	139	0	0	128	144	199	207	121	137	120	120	167	167
GiD0822	Gabon	9.3346	0.5787	121	123	218	218	143	149	132	132	200	212	156	162	137	143	171	173	264	264	124	124	126	134	246	246	142	142	186	200	125	135	0	0	108	128	199	205	121	137	120	124	169	175
GiD0827	Gabon	11.2258	-1.11208	117	121	212	212	142	143	132	136	204	210	156	158	129	141	169	171	264	264	128	128	122	124	0	0	152	152	186	186	125	135	217	223	108	108	199	199	127	137	124	124	169	169
GiD0836	Gabon	11.2287	-1.10692	117	123	212	212	142	142	134	136	210	216	154	158	139	143	169	169	260	260	128	128	122	124	246	246	142	152	186	200	127	133	217	217	122	122	199	205	137	137	120	124	169	169
GiD0837	Gabon	11.2361	-1.10555	121	121	212	212	142	145	132	134	210	218	154	154	123	123	159	169	260	264	124	128	126	126	246	246	152	152	186	200	123	135	217	217	108	108	199	203	127	137	120	124	167	169
GiD0981	Gabon	10.1915	0.45111	117	117	212	214	143	149	132	134	200	212	156	156	129	135	163	173	262	262	124	126	124	126	0	0	136	142	198	200	135	135	227	227	133	133	205	205	137	143	120	120	167	169
GiD1422	Gabon	12.7261	-0.23325	121	121	212	212	143	143	132	132	210	218	156	158	129	129	173	197	260	262	136	136	122	124	0	0	152	152	198	204	127	135	207	207	108	122	199	203	115	137	120	124	167	170
GiD1652	Gabon	11.1598	-3.6536	129	129	207	207	149	159	114	114	202	202	154	154	123	129	177	177	248	258	132	136	124	124	273	273	153	155	180	180	133	143	215	215	120	142	195	195	0	0	122	122	177	177
GiD1653	Gabon	11.4168	-3.42639	129	129	207	207	142	151	114	114	202	202	148	154	123	123	0	0	0	0	124	132	124	124	0	0	0	0	180	180	133	135	215	217	128	130	195	195	0	0	122	122	177	177
GiD1785	Gabon	10.4616	-0.82974	121	121	212	234	143	143	132	134	210	210	152	158	137	139	171	171	264	264	124	130	124	128	0	0	152	152	186	186	135	137	219	221	122	122	199	199	127	127	120	120	169	173
GiD1786	Gabon	10.5633	-0.83266	121	121	212	212	142	143	132	136	210	210	156	156	131	135	171	171	258	264	122	132	124	124	0	0	152	152	186	186	127	135	207	217	108	122	199	199	137	137	124	126	165	173
GiD1787	Gabon	10.4982	-0.82552	109	121	212	212	142	142	134	138	210	212	156	156	129	129	169	193	258	266	124	136	126	126	0	0	142	152	200	200	137	137	0	0	122	122	0	0	144	144	120	120	0	0
GiD1788	Gabon	10.6006	-0.76086	117	121	212	212	142	145	128	138	216	216	156	156	129	131	169	171	248	248	122	124	124	124	258	262	152	154	186	200	133	137	217	225	108	108	203	205	127	127	120	120	169	171
GK0036	Gabon	10.2694	0.47211	117	129	212	212	143	143	134	136	200	210	154	154	137	139	163	163	0	0	124	128	124	126	0	0	142	152	0	0	127	137	217	217	108	108	199	203	0	0	120	124	167	167
GK0037	Gabon	10.269	0.47107	117	129	206	212	145	147	134	134	212	224	158	158	129	129	169	169	258	262	124	124	126	126	246	246	142	152	200	200	135	135	213	217	108	108	199	205	137	137	120	124	169	169
GK0038	Gabon	10.2775	0.46807	117	117	212	212	145	145	134	134	218	224	156	156	135	135	169	173	258	258	124	128	124	126	0	0	142	142	186	200	127	135	217	217	108	123	203	205	137	139	120	120	167	167
GK0071	Gabon	12.7995	0.51191	123	125	212	246	165	165	134	134	200	200	156	156	127	127	177	177	256	256	126	130	122	126	0	0	142	142	0	0	137	137	221	221	130	130	201	201	0	0	132	132	175	175
GK0076	Gabon	12.7982	0.51257	123	123	212	212	149	163	132	134	200	200	158	160	137	139	169	177	256	256	130	130	122	124	260	264	142	142	198	204	131	131	217	221	130	130	201	201	127	137	124	132	175	175
GK0120	Gabon	12.7941	0.51638	123	123	212	246	163	165	134	134	200	200	152	152	127	137	177	177	256	256	124	130	122	122	260	260	142	142	198	204	131	135	221	221	130	130	201	201	137	137	124	124	175	175
GK0190	Gabon	13.2192	1.1152	123	125	212	216	149	155	134	134	200	214	152	160	137	139	169	169	256	256	124	130	0	0	0	0	136	142	204	204	135	161	221	221	128	130	201	201	137	137	132	132	175	175
GK0199	Gabon	13.2217	1.11725	117	123	218	246	149	155	132	134	200	214	152	152	137	137	173	175	256	256	130	130	122	122	260	262	142	142	200	204	131	137	211	221	130	130	199	201	121	121	132	132	175	175
GK0240	Gabon	13.2165	1.11442	123	123	208	216	163	165	132	144	200	214	152	152	127	137	177	177	256	256	124	124	128	128	0	0	142	142	200	204	131	135	211	221	128	130	201	201	121	137	124	132	0	0
GK0322	Gabon	12.5716	0.29107	117	121	224	224	142	143	124	136	210	210	158	158	129	129	193	193	0	0	116	124	126	126	0	0	142	152	200	200	123	139	217	217	122	123	203	203	127	137	124	124	169	171
GK0334	Gabon	12.571	0.29136	121	121	212	224	142	143	124	138	204	210	154	156	129	129	169	193	254	254	118	134	122	126	0	0	152	158	186	200	123	133	217	217	122	123	199	199	137	144	120	124	169	171
GK0357	Gabon	12.57	0.28584	121	123	212	212	143	143	124	136	210	210	158	158	129	139	197	203	254	260	128	134	122	124	0	0	152	154	186	200	133	135	217	217	108	108	203	203	127	137	124	124	169	171
MH0698	Gabon	9.3318	0.5439	111	123	214	228	147	147	132	134	200	218	150	152	131	137	169	169	258	264	124	124	124	126	246	246	142	142	186	200	127	131	227	229	128	128	199	199	137	142	120	124	167	169
MH0701	Gabon	9.3318	0.5439	121	123	212	216	145	147	132	134	200	212	156	156	135	137	169	173	262	264	124	124	124	126	262	262	142	142	186	200	125	129	227	227	108	123	199	205	139	142	120	124	167	169
MH0726	Gabon	9.3492	0.3407	117	121	212	214	145	145	134	134	200	212	158	162	137	139	173	173	0	0	124	126	126	126	0	0	142	142	0	0	129	133	231	231	108	122	199	205	137	137	120	124	169	175
MH0949	Gabon	11.5764	-0.1742	117	117	212	230	143	145	132	140	210	210	152	156	129	129	171	203	262	262	122	124	124	124	256	256	152	152	186	200	129	135	217	217	122	123	199	199	115	137	120	124	167	167
MH0979	Gabon	11.2522	-2.6695	105	131	207	207	143	167	114	140	202	202	146	154	123	123	179	179	223	248	134	138	124	126	276	276	153	155	180	180	143	147	227	227	108	144	195	205	0	0	120	122	177	177
MH1012	Gabon	11.2521	-2.6489	105	131	207	207	143	143	114	114	202	202	146	146	123	123	175	175	248	248	132	132	124	124	0	0	0	0	180	180	135	143	219	221	110	144	195	195	0	0	122	122	177	177
MH1036	Gabon	10.3783	0.6336	121	123	212	218	142	143	132	132	212	224	154	164	129	137	163	163	256	262	118	124	124	124	246	246	152	152	186	186	127	147	217	217	108	110	199	205	137	139	120	120	167	169
MH1250	Gabon	9.3248	0.3094	121	121	212	222	149	149	132	134	200	212	142	154	133	137	169	173	262	262	124	124	124	126	246	246	142	142	186	186	127	127	227	227	108	123	205	207	137	137	120	120	169	169
MH1255	Gabon	9.309	0.2974	111	121	212	218	139	147	132	138	200	200	156	162	129	137	169	179	258	258	124	128	124	126	246	252	152	152	186	186	135	137	227	227	108	128	199	207	133	133	124	124	169	169
MH1494	Gabon	11.129	2.8345	117	123	208	248	165	165	130	132	214	220	154	156	135	135	173	173	256	264	122	124	0	0	258	272	142	142	198	198	135	135	221	221	108	108	199	199	121	141	120	124	165	175
MH1503	Gabon	11.131	2.8321	117	117	208	212	165	165	130	132	200	210	152	156	135	135	169	175	256	256	116	124	122	122	262	262	142	142	198	198	135	135	221	221	108	130	199	199	141	141	120	128	175	177
MH1529	Gabon	10.7904	2.5182	117	123	206	216	145	155	124	138	200	216	152	152	133	145	173	173	256	258	126	130	122	126	0	0	142	142	198	198	125	127	209	221	128	140	199	199	121	137	120	120	169	175
MH1638	Gabon	9.9469	2.2851	109	123	212	226	145	145	124	132	210	212	154	156	139	141	163	163	0	0	116	124	122	138	0	0	142	142	0	0	125	135	211	211	128	132	199	203	137	137	120	124	163	167
MH1828	Gabon	9.9509	2.2825	121	123	212	212	145	149	130	134	210	210	148	152	133	137	169	169	0	0	116	124	122	122	0	0	142	142	0	0	125	135	0	0	108	108	199	199	137	137	120	120	163	167
NKA10	Gabon	9.45665	-0.847773	121	121	214	214	143	149	124	124	210	210	154	162	133	147	173	173	266	266	124	124	126	126	262	262	152	152	186	198	131	137	225	225	108	108	205	205	0	0	120	120	167	169
NKA11	Gabon	10.0557	-0.47737	121	121	214	214	143	143	136	136	210	212	154	156	133	137	169	173	264	264	124	128	126	126	256	258	142	142	186	186	133	137	0	0	108	122	199	205	0	0	124	124	169	169
NKA12	Gabon	10.0864	-0.50924	123	123	212	212	143	143	132	134	216	216	152	154	137	143	169	173	260	264	124	134	124	126	246	256	152	152	186	186	135	135	215	217	122	122	203	205	115	137	120	120	167	167
NKA13	Gabon	12.5302	-0.17297	117	117	216	226	143	143	132	136	210	210	156	158	129	129	169	169	260	266	128	132	122	126	256	256	142	152	186	186	135	135	217	217	108	108	203	203	127	137	120	124	167	171
NKA14	Gabon	13.3256	-0.97382	117	119	212	212	143	143	134	134	210	210	152	158	139	141	169	169	256	256	126	126	0	0	246	258	142	152	200	200	127	133	217	217	108	122	205	205	137	137	120	120	163	169
NKA9	Gabon	10.3992	0.6172	121	121	212	226	143	143	134	136	200	224	152	154	133	135	163	189	248	262	124	126	126	126	0	0	142	142	186	200	127	135	217	217	130	149	203	205	137	137	120	120	167	169
OH0103	Gabon	9.3345	0.5749	111	123	214	228	147	147	132	134	200	218	150	152	131	137	169	169	258	264	124	124	124	126	0	0	142	142	186	200	127	131	227	229	128	128	199	199	137	141	120	124	167	169
OH0115	Gabon	12.7991	0.0085	123	123	212	246	143	143	128	134	200	216	156	160	135	135	169	177	256	262	130	130	124	126	246	246	142	154	200	200	135	135	219	223	122	130	201	201	137	137	120	132	169	175
OH1559	Gabon	10.1639	-2.7864	131	131	207	207	149	167	114	114	202	202	146	152	123	131	173	173	248	248	134	136	124	128	276	276	155	155	180	180	137	141	219	221	108	124	195	195	131	131	122	124	177	177
OH1560	Gabon	10.144	-2.7666	131	131	207	207	163	169	114	114	202	204	146	146	123	131	173	173	258	258	134	136	124	126	276	276	153	155	180	180	135	149	213	213	108	140	195	195	131	131	122	124	177	177
OH1561	Gabon	10.1491	-2.7706	105	137	207	207	167	169	114	114	202	204	146	146	123	131	179	179	248	258	132	136	124	128	276	276	153	153	180	180	135	141	223	225	108	126	195	195	131	131	122	122	177	177
OH1562	Gabon	10.1509	-2.7666	105	105	207	207	167	175	114	114	202	202	146	156	123	131	175	177	248	258	132	132	124	124	276	276	153	153	180	180	135	149	221	221	108	140	195	195	131	131	122	122	177	177
OH1563	Gabon	10.171	-2.3836	129	131	207	228	167	175	114	114	202	202	146	152	131	131	0	0	0	0	132	136	124	124	0	0	0	0	180	180	137	147	209	211	108	142	195	195	131	131	120	120	177	177
OH1564	Gabon	10.1753	-2.3864	129	131	207	207	165	167	114	130	202	202	150	162	123	123	173	173	0	0	134	136	124	124	0	0	0	0	180	180	137	145	221	221	108	146	195	195	131	131	120	122	177	177
OH1565	Gabon	10.1755	-2.3805	105	121	207	207	153	167	114	114	202	202	146	150	123	131	173	173	255	255	128	136	124	124	276	276	155	155	180	180	137	149	211	211	108	124	195	195	131	131	122	122	177	177
OH1670	Gabon	10.135	-2.389	131	133	207	207	165	167	114	114	202	202	146	150	123	123	179	179	248	248	132	134	124	124	276	276	153	155	180	180	145	147	219	221	122	124	195	195	131	131	122	122	177	177
OH1678	Gabon	9.6444	-2.4019	105	105	207	207	153	153	118	132	202	202	146	148	131	131	171	175	248	248	134	142	124	124	0	0	153	153	180	180	135	135	221	221	124	124	195	195	0	0	120	122	177	177
OH1976	Gabon	10.6475	3.32536	109	109	218	224	139	149	112	144	200	212	160	166	127	133	173	173	262	262	124	124	134	134	262	262	142	142	194	202	131	135	215	223	128	128	199	199	137	137	120	132	165	177
OH2585	Gabon	10.1735	0.49493	117	121	212	222	143	143	122	134	208	210	156	158	131	139	165	197	244	258	124	126	126	126	0	0	142	157	186	200	133	135	219	219	123	128	205	205	139	139	120	120	167	167
OH2610	Gabon	10.2073	0.52487	117	119	212	212	143	143	124	132	210	212	156	160	129	129	169	173	244	258	124	124	126	128	246	246	142	142	192	196	127	139	0	0	108	128	205	205	137	137	120	120	167	169
OH2617	Gabon	10.3505	0.69684	121	123	206	212	145	145	134	136	216	224	152	154	129	133	169	173	248	252	124	128	124	128	258	262	142	142	186	200	135	141	217	217	108	123	203	205	137	142	120	120	167	169
OH2621	Gabon	10.3497	0.69609	117	117	206	206	145	149	122	134	212	212	152	156	141	141	163	193	256	260	124	130	122	126	258	262	142	142	186	186	129	137	0	0	108	123	199	205	137	137	120	120	167	171
OH2634	Gabon	10.3462	0.70658	117	117	212	226	143	145	132	132	212	224	156	158	137	143	163	197	262	262	122	124	126	128	0	0	142	152	186	200	129	129	215	215	128	140	199	199	137	142	124	124	169	169
OH2690	Gabon	10.9372	0.99509	117	123	212	212	143	143	130	134	200	210	152	154	129	129	169	169	0	0	124	124	124	124	0	0	142	152	0	0	141	141	0	0	108	108	203	205	127	137	124	124	169	171
OH2742	Gabon	11.3272	0.98334	117	121	212	216	143	143	134	134	200	210	152	156	137	137	183	183	260	262	124	124	124	124	0	0	152	152	202	204	127	127	0	0	108	108	203	205	137	139	124	124	171	171
OH2869	Gabon	11.4741	0.52583	117	117	212	212	143	143	130	132	210	210	152	156	129	139	169	169	258	262	122	136	124	124	262	262	142	152	204	204	133	133	217	217	108	122	199	205	127	137	120	124	169	171
OH2903	Gabon	11.5066	0.51164	117	121	212	212	143	143	134	136	210	220	156	158	129	137	169	171	262	266	124	124	126	126	264	264	152	152	200	204	133	133	217	221	108	122	203	205	137	137	124	124	167	171
OH2917	Gabon	11.4424	0.35261	121	121	212	212	143	143	134	140	210	216	158	158	129	129	163	181	264	266	124	124	124	126	0	0	152	152	200	204	127	133	217	221	108	108	205	205	137	137	124	124	169	175
OH2922	Gabon	11.1924	0.28167	117	121	212	212	143	143	136	138	210	216	156	158	129	129	173	193	262	262	124	124	124	126	0	0	142	152	186	200	133	137	217	217	124	130	199	205	127	127	124	124	167	177
OH2951	Gabon	11.1859	0.51131	119	123	212	212	143	143	130	134	200	200	156	158	129	129	169	169	254	262	124	134	124	126	256	258	142	152	200	204	123	127	217	217	123	123	201	205	137	137	124	124	169	169
OH2971	Gabon	11.11	0.56127	121	121	212	212	143	143	134	136	210	216	154	158	129	139	169	169	262	266	124	124	124	124	256	256	142	152	200	206	127	127	217	217	108	123	199	205	137	137	124	124	169	171
OH2989	Gabon	11.1122	0.5849	121	121	212	236	143	143	130	134	210	210	152	156	137	137	169	169	262	262	116	134	124	126	256	260	152	152	204	204	127	127	217	221	124	124	203	205	137	137	120	124	167	169
OH3014	Gabon	11.1114	0.56014	117	117	212	212	143	143	124	136	210	216	156	158	129	139	163	181	256	264	116	128	124	124	256	258	142	152	186	202	127	127	217	219	108	108	203	203	137	137	124	124	169	171
OH3029	Gabon	11.2063	0.54448	121	123	212	212	143	143	124	134	210	222	156	156	137	139	181	193	254	262	124	136	124	124	262	264	142	152	186	204	127	127	217	233	0	0	199	205	115	137	124	126	169	171
OH3047	Gabon	11.203	0.29951	121	121	214	218	143	143	130	134	210	222	152	158	129	137	169	169	262	262	124	124	124	126	262	262	142	152	200	202	127	141	213	217	108	123	205	205	137	137	120	124	169	171
OH3100	Gabon	10.7041	-0.15422	121	121	212	212	142	143	134	136	200	212	152	154	131	135	169	193	256	264	116	116	124	124	0	0	152	152	186	186	123	141	217	217	108	153	205	205	115	137	120	124	169	169
OH3117	Gabon	10.5633	-0.20555	117	123	212	228	143	143	136	136	210	216	156	156	129	131	169	195	256	256	124	124	122	124	246	258	152	154	186	192	129	129	217	217	122	128	203	205	127	137	124	124	167	171
OH4847	Gabon	10.3591	2.40675	123	123	212	220	145	145	108	132	200	200	152	154	137	143	169	169	256	264	122	130	128	136	260	260	142	154	200	210	127	127	213	215	128	128	199	199	137	137	120	120	167	169
OH4848	Gabon	10.2591	2.35929	123	123	216	218	145	145	112	132	210	212	156	166	133	133	169	173	256	264	124	124	122	126	258	262	142	142	198	200	129	129	221	223	128	134	199	201	137	137	120	120	169	169
OH4849	Gabon	10.4765	2.27628	123	125	212	218	145	159	130	132	210	212	152	154	133	139	169	169	256	262	116	118	124	126	258	260	142	142	198	220	125	129	211	211	130	140	199	199	121	137	120	120	167	175
OH4850	Gabon	10.4167	2.29592	123	125	212	214	149	149	122	136	212	228	152	162	137	139	169	173	256	264	124	130	126	126	246	262	142	152	200	200	125	125	221	221	128	128	199	199	137	137	120	134	169	169
RM0055	Gabon	12.0465	0.57252	117	121	216	226	143	143	124	140	210	214	154	156	137	137	181	195	258	258	124	134	126	126	0	0	152	152	186	202	123	135	217	217	108	108	201	205	127	137	124	124	165	169
RM0100	Gabon	12.873	-0.41704	121	121	216	216	143	155	136	136	210	210	148	156	129	131	169	169	258	260	130	130	126	126	246	264	152	152	188	200	123	135	217	217	122	122	205	205	127	137	120	120	171	171
RM0124	Gabon	12.0965	0.6289	121	121	212	214	143	143	130	136	226	230	152	156	137	137	173	193	256	260	124	128	124	126	256	256	152	152	200	200	125	135	217	219	108	108	203	205	127	137	120	124	167	169
RM0129	Gabon	12.0748	0.57515	117	121	216	224	143	143	132	136	216	216	158	158	129	129	157	181	252	262	124	128	126	126	258	258	152	152	186	186	129	143	217	223	108	108	203	205	127	137	124	124	169	171
RM0136	Gabon	11.9947	1.62682	121	121	212	212	145	145	134	134	210	210	156	160	143	143	181	181	260	262	124	124	134	144	258	258	154	154	198	202	125	127	0	0	123	140	203	205	137	137	120	128	165	167
RM0146	Gabon	12.1594	1.65584	109	109	216	218	143	143	124	124	210	212	158	162	129	129	173	173	262	262	122	130	122	122	0	0	142	152	198	202	131	137	0	0	130	130	199	199	0	0	120	120	167	169
RM0158	Gabon	12.075	0.57598	117	123	216	226	143	143	124	138	216	226	154	158	129	137	169	181	252	260	134	134	126	126	246	258	152	152	188	200	123	127	219	219	122	123	199	201	137	137	124	124	169	169
RM0164	Gabon	12.0383	1.64119	121	121	218	218	145	149	132	132	210	212	150	150	139	143	169	169	262	264	122	124	126	126	246	258	142	154	186	200	125	135	209	217	128	130	199	203	137	137	120	120	167	177
TS0044	Gabon	11.1071	-0.5844	121	121	218	228	143	143	130	136	210	210	154	158	125	137	169	169	258	262	122	124	126	126	0	0	152	152	200	208	135	141	219	231	122	122	199	203	137	137	120	120	167	169
TS0045	Gabon	11.1098	-0.5809	121	121	212	212	143	143	134	136	210	210	154	160	123	129	169	169	264	272	124	134	126	126	0	0	152	152	202	212	135	135	219	221	108	108	203	205	137	137	124	124	169	171
OH5821	Republic of Congo	12.2533	-4.38291	121	129	207	207	142	167	114	114	202	202	156	160	129	129	175	175	258	258	124	134	124	124	273	273	153	155	180	180	133	135	215	223	110	138	195	195	135	135	122	122	177	177
OH6459	Republic of Congo	12.4302	-4.22896	113	113	207	207	142	142	114	114	202	202	154	154	129	129	197	197	258	258	132	132	124	124	273	273	157	157	180	180	135	137	215	223	120	142	195	195	133	133	122	122	177	177
OH6472	Republic of Congo	12.4282	-4.22993	121	121	207	207	142	167	114	114	202	202	154	154	129	129	173	173	258	258	132	132	124	124	273	276	153	155	180	180	135	135	199	215	110	138	195	195	0	0	122	122	177	177
OH6495	Republic of Congo	12.4297	-4.23205	121	129	207	207	142	167	114	114	202	202	154	156	129	129	173	197	258	258	132	132	124	124	273	276	153	153	180	180	133	135	199	223	138	140	195	195	135	135	122	122	177	177
BR32	Democratic Repubic of Congo	13.0667	-5.63333	121	121	207	207	142	142	114	114	202	202	152	152	0	0	0	0	0	0	0	0	0	0	0	0	157	157	180	180	133	135	0	0	0	0	0	0	0	0	122	122	0	0
BR33	Democratic Repubic of Congo	12.8167	-5.26667	121	121	0	0	142	142	114	114	202	202	154	154	0	0	0	0	0	0	0	0	124	124	0	0	0	0	180	180	135	137	0	0	0	0	0	0	135	135	0	0	177	177
BR34	Democratic Repubic of Congo	15.1	-5.13333	121	121	208	210	142	142	114	114	202	202	154	154	0	0	0	0	0	0	0	0	0	0	0	0	153	157	180	180	135	135	0	0	0	0	0	0	133	133	0	0	0	0
BR35	Democratic Repubic of Congo	13.1171	-4.67512	121	121	207	207	142	167	0	0	202	202	154	154	0	0	0	0	0	0	0	0	0	0	0	0	0	0	180	180	133	135	207	207	0	0	0	0	0	0	0	0	0	0
